# Supplementary material for: Day-night and seasonal variation of human gene expression across tissues
Source: PLoS Biol. 2023 Feb 6;21(2):e3001986. doi: 10.1371/journal.pbio.3001986 (PMC9934459; doi:10.1371/journal.pbio.3001986)
Supplement: S16 Table — List of 62 genes with hormone-encoding capability based on Mirabeau and colleagues [45]. (XLSX) [file pbio.3001986.s038.xlsx]

## Sheet: S16 Table
GeneID	Gene_Symbol	Description
ENSG00000141433.12	ADCYAP1	adenylate cyclase activating polypeptide 1 [Source:HGNC Symbol;Acc:HGNC:241]
ENSG00000148926.9	ADM	adrenomedullin [Source:HGNC Symbol;Acc:HGNC:259]
ENSG00000101200.5	AVP	arginine vasopressin [Source:HGNC Symbol;Acc:HGNC:894]
ENSG00000110680.12	CALCA	calcitonin related polypeptide alpha [Source:HGNC Symbol;Acc:HGNC:1437]
ENSG00000175868.13	CALCB	calcitonin related polypeptide beta [Source:HGNC Symbol;Acc:HGNC:1438]
ENSG00000164326.4	CARTPT	CART prepropeptide [Source:HGNC Symbol;Acc:HGNC:24323]
ENSG00000187094.11	CCK	cholecystokinin [Source:HGNC Symbol;Acc:HGNC:1569]
ENSG00000135346.8	CGA	glycoprotein hormones, alpha polypeptide [Source:HGNC Symbol;Acc:HGNC:1885]
ENSG00000267631.4	CGB1	chorionic gonadotropin subunit beta 1 [Source:HGNC Symbol;Acc:HGNC:16721]
ENSG00000104818.14	CGB2	chorionic gonadotropin subunit beta 2 [Source:HGNC Symbol;Acc:HGNC:16722]
ENSG00000104827.12	CGB3	chorionic gonadotropin subunit beta 3 [Source:HGNC Symbol;Acc:HGNC:1886]
ENSG00000189052.6	CGB5	chorionic gonadotropin subunit beta 5 [Source:HGNC Symbol;Acc:HGNC:16452]
ENSG00000196337.11	CGB7	chorionic gonadotropin subunit beta 7 [Source:HGNC Symbol;Acc:HGNC:16451]
ENSG00000213030.5	CGB8	chorionic gonadotropin subunit beta 8 [Source:HGNC Symbol;Acc:HGNC:16453]
ENSG00000147571.4	CRH	corticotropin releasing hormone [Source:HGNC Symbol;Acc:HGNC:2355]
ENSG00000131808.10	FSHB	follicle stimulating hormone subunit beta [Source:HGNC Symbol;Acc:HGNC:3964]
ENSG00000069482.6	GAL	galanin and GMAP prepropeptide [Source:HGNC Symbol;Acc:HGNC:4114]
ENSG00000197487.8	GALP	galanin like peptide [Source:HGNC Symbol;Acc:HGNC:24840]
ENSG00000184502.3	GAST	gastrin [Source:HGNC Symbol;Acc:HGNC:4164]
ENSG00000115263.14	GCG	glucagon [Source:HGNC Symbol;Acc:HGNC:4191]
ENSG00000259384.6	GH1	growth hormone 1 [Source:HGNC Symbol;Acc:HGNC:4261]
ENSG00000118702.9	GHRH	growth hormone releasing hormone [Source:HGNC Symbol;Acc:HGNC:4265]
ENSG00000157017.15	GHRL	ghrelin and obestatin prepropeptide [Source:HGNC Symbol;Acc:HGNC:18129]
ENSG00000159224.4	GIP	gastric inhibitory polypeptide [Source:HGNC Symbol;Acc:HGNC:4270]
ENSG00000147437.9	GNRH1	gonadotropin releasing hormone 1 [Source:HGNC Symbol;Acc:HGNC:4419]
ENSG00000134443.9	GRP	gastrin releasing peptide [Source:HGNC Symbol;Acc:HGNC:4605]
ENSG00000105697.7	HAMP	hepcidin antimicrobial peptide [Source:HGNC Symbol;Acc:HGNC:15598]
ENSG00000161610.1	HCRT	hypocretin neuropeptide precursor [Source:HGNC Symbol;Acc:HGNC:4847]
ENSG00000121351.7	IAPP	islet amyloid polypeptide [Source:HGNC Symbol;Acc:HGNC:5329]
ENSG00000017427.15	IGF1	insulin like growth factor 1 [Source:HGNC Symbol;Acc:HGNC:5464]
ENSG00000167244.18	IGF2	insulin like growth factor 2 [Source:HGNC Symbol;Acc:HGNC:5466]
ENSG00000254647.6	INS	insulin [Source:HGNC Symbol;Acc:HGNC:6081]
ENSG00000120211.4	INSL4	insulin like 4 [Source:HGNC Symbol;Acc:HGNC:6087]
ENSG00000172410.4	INSL5	insulin like 5 [Source:HGNC Symbol;Acc:HGNC:6088]
ENSG00000174697.4	LEP	leptin [Source:HGNC Symbol;Acc:HGNC:6553]
ENSG00000104826.12	LHB	luteinizing hormone subunit beta [Source:HGNC Symbol;Acc:HGNC:6584]
ENSG00000096395.10	MLN	motilin [Source:HGNC Symbol;Acc:HGNC:7141]
ENSG00000197696.9	NMB	neuromedin B [Source:HGNC Symbol;Acc:HGNC:7842]
ENSG00000109255.11	NMU	neuromedin U [Source:HGNC Symbol;Acc:HGNC:7859]
ENSG00000183979.7	NPB	neuropeptide B [Source:HGNC Symbol;Acc:HGNC:30099]
ENSG00000139574.8	NPFF	neuropeptide FF-amide peptide precursor [Source:HGNC Symbol;Acc:HGNC:7901]
ENSG00000120937.8	NPPB	natriuretic peptide B [Source:HGNC Symbol;Acc:HGNC:7940]
ENSG00000163273.3	NPPC	natriuretic peptide C [Source:HGNC Symbol;Acc:HGNC:7941]
ENSG00000183971.6	NPW	neuropeptide W [Source:HGNC Symbol;Acc:HGNC:30509]
ENSG00000122585.7	NPY	neuropeptide Y [Source:HGNC Symbol;Acc:HGNC:7955]
ENSG00000133636.10	NTS	neurotensin [Source:HGNC Symbol;Acc:HGNC:8038]
ENSG00000101405.3	OXT	oxytocin/neurophysin I prepropeptide [Source:HGNC Symbol;Acc:HGNC:8528]
ENSG00000101327.8	PDYN	prodynorphin [Source:HGNC Symbol;Acc:HGNC:8820]
ENSG00000181195.10	PENK	proenkephalin [Source:HGNC Symbol;Acc:HGNC:8831]
ENSG00000183395.4	PMCH	pro-melanin concentrating hormone [Source:HGNC Symbol;Acc:HGNC:9109]
ENSG00000115138.10	POMC	proopiomelanocortin [Source:HGNC Symbol;Acc:HGNC:9201]
ENSG00000108849.7	PPY	pancreatic polypeptide [Source:HGNC Symbol;Acc:HGNC:9327]
ENSG00000071677.1	PRLH	prolactin releasing hormone [Source:HGNC Symbol;Acc:HGNC:17945]
ENSG00000163421.8	PROK2	prokineticin 2 [Source:HGNC Symbol;Acc:HGNC:18455]
ENSG00000152266.6	PTH	parathyroid hormone [Source:HGNC Symbol;Acc:HGNC:9606]
ENSG00000087494.15	PTHLH	parathyroid hormone like hormone [Source:HGNC Symbol;Acc:HGNC:9607]
ENSG00000131096.10	PYY	peptide YY [Source:HGNC Symbol;Acc:HGNC:9748]
ENSG00000107018.7	RLN1	relaxin 1 [Source:HGNC Symbol;Acc:HGNC:10026]
ENSG00000107014.8	RLN2	relaxin 2 [Source:HGNC Symbol;Acc:HGNC:10027]
ENSG00000171136.6	RLN3	relaxin 3 [Source:HGNC Symbol;Acc:HGNC:17135]
ENSG00000070031.3	SCT	secretin [Source:HGNC Symbol;Acc:HGNC:10607]
ENSG00000157005.3	SST	somatostatin [Source:HGNC Symbol;Acc:HGNC:11329]
ENSG00000006128.11	TAC1	tachykinin precursor 1 [Source:HGNC Symbol;Acc:HGNC:11517]
ENSG00000166863.11	TAC3	tachykinin precursor 3 [Source:HGNC Symbol;Acc:HGNC:11521]
ENSG00000176358.15	TAC4	tachykinin precursor 4 [Source:HGNC Symbol;Acc:HGNC:16641]
ENSG00000170893.3	TRH	thyrotropin releasing hormone [Source:HGNC Symbol;Acc:HGNC:12298]
ENSG00000134200.3	TSHB	thyroid stimulating hormone subunit beta [Source:HGNC Symbol;Acc:HGNC:12372]
ENSG00000163794.6	UCN	urocortin [Source:HGNC Symbol;Acc:HGNC:12516]
ENSG00000145040.3	UCN2	urocortin 2 [Source:HGNC Symbol;Acc:HGNC:18414]
ENSG00000178473.6	UCN3	urocortin 3 [Source:HGNC Symbol;Acc:HGNC:17781]
ENSG00000049247.13	UTS2	urotensin 2 [Source:HGNC Symbol;Acc:HGNC:12636]
ENSG00000188958.9	UTS2B	urotensin 2B [Source:HGNC Symbol;Acc:HGNC:30894]
ENSG00000146469.12	VIP	vasoactive intestinal peptide [Source:HGNC Symbol;Acc:HGNC:12693]
