# Supplementary material for: Day-night and seasonal variation of human gene expression across tissues
Source: PLoS Biol. 2023 Feb 6;21(2):e3001986. doi: 10.1371/journal.pbio.3001986 (PMC9934459; doi:10.1371/journal.pbio.3001986)
Supplement: S21 Table — List of drug-target seasonal gene pairs. The number of tissues in which the seasonal gene is up- or down-regulated in each season is provided. (XLSX) [file pbio.3001986.s043.xlsx]

## Sheet: S21 Table
drug	gene	name	season	up	down
BI-505	ENSG00000090339.8	ICAM1	Fall	7	0
SB-202190	ENSG00000188130.13	MAPK12	Fall	6	0
SB-202190	ENSG00000188130.13	MAPK12	Summer	0	6
CHEMBL526776	ENSG00000161800.12	RACGAP1	Spring	8	1
VERAPAMIL	ENSG00000182389.19	CACNB4	Winter	6	0
FLUNISOLIDE	ENSG00000100197.20	CYP2D6	Fall	6	0
CHEMBL31741	ENSG00000100197.20	CYP2D6	Fall	6	0
VANDETANIB	ENSG00000102755.11	FLT1	Winter	1	8
NICLOSAMIDE	ENSG00000168610.14	STAT3	Spring	0	6
SB-224289	ENSG00000090534.17	THPO	Fall	6	0
CHEMBL1256735	ENSG00000002016.17	RAD52	Fall	6	0
PROPACHLOR	ENSG00000112033.13	PPARD	Fall	6	0
BUSULFAN	ENSG00000116761.11	CTH	Fall	7	0
LUBIPROSTONE	ENSG00000114859.15	CLCN2	Fall	7	1
CHEMBL307893	ENSG00000162551.13	ALPL	Fall	6	0
POZIOTINIB	ENSG00000146648.17	EGFR	Summer	0	6
RANITIDINE	ENSG00000100197.20	CYP2D6	Fall	6	0
NS-398	ENSG00000100197.20	CYP2D6	Fall	6	0
CHEMBL1609016	ENSG00000185513.14	L3MBTL1	Fall	6	0
CHEMBL1609016	ENSG00000185513.14	L3MBTL1	Summer	0	6
ISOORIENTIN	ENSG00000161800.12	RACGAP1	Spring	8	1
NINTEDANIB	ENSG00000102755.11	FLT1	Winter	1	8
GATIFLOXACIN	ENSG00000176444.18	CLK2	Fall	6	0
TRIMIPRAMINE	ENSG00000100197.20	CYP2D6	Fall	6	0
TICRYNAFEN	ENSG00000100197.20	CYP2D6	Fall	6	0
NIVOLUMAB	ENSG00000122512.14	PMS2	Winter	8	0
FLUVOXAMINE	ENSG00000093010.13	COMT	Fall	7	0
THIOGUANINE	ENSG00000147224.10	PRPS1	Fall	1	7
METFORMIN	ENSG00000142330.19	CAPN10	Fall	6	0
NV-128	ENSG00000090266.12	NDUFB2	Fall	0	6
NV-128	ENSG00000090266.12	NDUFB2	Spring	7	0
NV-128	ENSG00000090266.12	NDUFB2	Summer	7	1
ATACICEPT	ENSG00000161955.16	TNFSF13	Fall	6	0
AMILORIDE	ENSG00000213199.7	ASIC3	Fall	6	0
DYPHYLLINE	ENSG00000184588.17	PDE4B	Summer	6	0
VADIMEZAN	ENSG00000198355.4	PIM3	Fall	7	0
VADIMEZAN	ENSG00000198355.4	PIM3	Winter	1	9
PARAROSANILINE	ENSG00000100197.20	CYP2D6	Fall	6	0
DEFEROXAMINE	ENSG00000198959.11	TGM2	Fall	7	0
DEFEROXAMINE	ENSG00000198959.11	TGM2	Spring	0	6
CHEMBL1486366	ENSG00000166851.14	PLK1	Fall	9	0
CARFILZOMIB	ENSG00000115233.11	PSMD14	Fall	0	7
DICHLOROPHEN	ENSG00000112033.13	PPARD	Fall	6	0
PANITUMUMAB	ENSG00000146648.17	EGFR	Summer	0	6
CHEMBL119878	ENSG00000166851.14	PLK1	Fall	9	0
TOLMETIN	ENSG00000073756.11	PTGS2	Summer	7	0
ALCOHOL	ENSG00000100197.20	CYP2D6	Fall	6	0
TAFAMIDIS	ENSG00000118271.9	TTR	Spring	7	0
MELOXICAM	ENSG00000073756.11	PTGS2	Summer	7	0
BRENTUXIMAB VEDOTIN	ENSG00000137285.9	TUBB2B	Fall	8	0
BISPHENOL A	ENSG00000112033.13	PPARD	Fall	6	0
KETOROLAC	ENSG00000100197.20	CYP2D6	Fall	6	0
EVEROLIMUS	ENSG00000118046.14	STK11	Fall	6	0
CLEBOPRIDE	ENSG00000100197.20	CYP2D6	Fall	6	0
THUNBERGINOL B	ENSG00000161800.12	RACGAP1	Spring	8	1
ZERANOL	ENSG00000096384.19	HSP90AB1	Summer	6	0
TENOFOVIR	ENSG00000124574.14	ABCC10	Fall	6	0
DASATINIB	ENSG00000142627.12	EPHA2	Winter	0	8
GEFITINIB	ENSG00000146648.17	EGFR	Summer	0	6
APICIDIN	ENSG00000100429.17	HDAC10	Fall	10	0
SP-600125	ENSG00000100644.16	HIF1A	Fall	6	0
SP-600125	ENSG00000100644.16	HIF1A	Spring	1	8
FENRETINIDE	ENSG00000175197.11	DDIT3	Winter	0	6
SOTRASTAURIN	ENSG00000198355.4	PIM3	Fall	7	0
SOTRASTAURIN	ENSG00000198355.4	PIM3	Winter	1	9
CHEMBL180917	ENSG00000108773.10	KAT2A	Summer	0	6
CAPMATINIB	ENSG00000146648.17	EGFR	Summer	0	6
FLUOROURACIL	ENSG00000164867.10	NOS3	Fall	8	2
FLUOROURACIL	ENSG00000164867.10	NOS3	Winter	0	9
SB-202190	ENSG00000163482.11	STK36	Summer	0	8
ALLITINIB	ENSG00000146648.17	EGFR	Summer	0	6
AZD-4769	ENSG00000146648.17	EGFR	Summer	0	6
IBUPROFEN	ENSG00000073756.11	PTGS2	Summer	7	0
VOLANESORSEN SODIUM	ENSG00000104879.4	CKM	Summer	7	2
VOLANESORSEN SODIUM	ENSG00000104879.4	CKM	Winter	0	10
TACEDINALINE	ENSG00000061273.17	HDAC7	Fall	12	0
CHEMBL578504	ENSG00000168610.14	STAT3	Spring	0	6
ENPROFYLLINE	ENSG00000065989.15	PDE4A	Spring	6	0
ANDROSTANOLONE	ENSG00000151376.16	ME3	Spring	6	0
PELITINIB	ENSG00000146648.17	EGFR	Summer	0	6
FORODESINE HYDROCHLORIDE	ENSG00000198805.11	PNP	Winter	0	7
PHENYLBUTAZONE	ENSG00000073756.11	PTGS2	Summer	7	0
CHEMBL1606	ENSG00000112033.13	PPARD	Fall	6	0
DOVITINIB	ENSG00000102755.11	FLT1	Winter	1	8
SIROLIMUS	ENSG00000198959.11	TGM2	Fall	7	0
SIROLIMUS	ENSG00000198959.11	TGM2	Spring	0	6
ALPELISIB	ENSG00000133056.13	PIK3C2B	Summer	6	1
DOXORUBICIN	ENSG00000100197.20	CYP2D6	Fall	6	0
CAPSAZEPINE	ENSG00000100197.20	CYP2D6	Fall	6	0
CHEMBL1086377	ENSG00000051382.8	PIK3CB	Fall	0	9
HYDROCHLOROTHIAZIDE	ENSG00000127337.6	YEATS4	Fall	0	7
CHEMBL1077773	ENSG00000146648.17	EGFR	Summer	0	6
AFATINIB	ENSG00000146648.17	EGFR	Summer	0	6
TESEVATINIB	ENSG00000146648.17	EGFR	Summer	0	6
EVEROLIMUS	ENSG00000103197.16	TSC2	Fall	7	0
GW7647	ENSG00000112033.13	PPARD	Fall	6	0
BERGAPTEN	ENSG00000100197.20	CYP2D6	Fall	6	0
LEVONORDEFRIN	ENSG00000100644.16	HIF1A	Fall	6	0
LEVONORDEFRIN	ENSG00000100644.16	HIF1A	Spring	1	8
NERATINIB	ENSG00000146648.17	EGFR	Summer	0	6
CHEMBL1528359	ENSG00000100644.16	HIF1A	Fall	6	0
CHEMBL1528359	ENSG00000100644.16	HIF1A	Spring	1	8
TAE-684	ENSG00000173846.12	PLK3	Winter	0	7
LAPATINIB	ENSG00000146648.17	EGFR	Summer	0	6
NOSCAPINE	ENSG00000100644.16	HIF1A	Fall	6	0
NOSCAPINE	ENSG00000100644.16	HIF1A	Spring	1	8
CRISABOROLE	ENSG00000184588.17	PDE4B	Summer	6	0
CEP-11981	ENSG00000148053.15	NTRK2	Summer	6	1
ALPELISIB	ENSG00000051382.8	PIK3CB	Fall	0	9
LITHIUM	ENSG00000148053.15	NTRK2	Summer	6	1
GADOFOSVESET	ENSG00000163631.16	ALB	Fall	0	8
GADOFOSVESET	ENSG00000163631.16	ALB	Summer	10	0
DACOMITINIB	ENSG00000146648.17	EGFR	Summer	0	6
2-PICOLINIC ACID	ENSG00000185513.14	L3MBTL1	Fall	6	0
2-PICOLINIC ACID	ENSG00000185513.14	L3MBTL1	Summer	0	6
HYDRAMETHYLNON	ENSG00000112033.13	PPARD	Fall	6	0
NV-128	ENSG00000165264.10	NDUFB6	Fall	0	9
UMBRALISIB	ENSG00000213923.11	CSNK1E	Fall	8	0
CHEMBL20377	ENSG00000100197.20	CYP2D6	Fall	6	0
CHEMBL1983317	ENSG00000124588.19	NQO2	Fall	0	9
CHEMBL1983317	ENSG00000124588.19	NQO2	Spring	8	0
SULFURETIN	ENSG00000115233.11	PSMD14	Fall	0	7
CHEMBL487046	ENSG00000109971.13	HSPA8	Summer	8	0
MURAGLITAZAR	ENSG00000078401.6	EDN1	Summer	0	6
MURAGLITAZAR	ENSG00000078401.6	EDN1	Winter	6	0
METHIMAZOLE	ENSG00000242252.1	BGLAP	Fall	7	0
METHIMAZOLE	ENSG00000242252.1	BGLAP	Winter	0	7
PAC-14028	ENSG00000196689.11	TRPV1	Fall	10	0
MODAFINIL	ENSG00000100197.20	CYP2D6	Fall	6	0
COPANLISIB	ENSG00000133056.13	PIK3C2B	Summer	6	1
FUMARPROTOCETRARIC ACID	ENSG00000042088.13	TDP1	Winter	7	0
ZEARALENONE	ENSG00000096384.19	HSP90AB1	Summer	6	0
EFLORNITHINE HYDROCHLORIDE	ENSG00000115758.12	ODC1	Spring	0	9
FALNIDAMOL	ENSG00000146648.17	EGFR	Summer	0	6
CHEMBL578944	ENSG00000002016.17	RAD52	Fall	6	0
DAPSONE	ENSG00000147437.9	GNRH1	Spring	8	0
NEPAFENAC	ENSG00000073756.11	PTGS2	Summer	7	0
SORAFENIB	ENSG00000099875.14	MKNK2	Fall	8	0
SORAFENIB	ENSG00000099875.14	MKNK2	Winter	1	7
NV-128	ENSG00000147684.7	NDUFB9	Fall	0	7
IXAZOMIB CITRATE	ENSG00000106588.10	PSMA2	Fall	0	7
CHEMBL476968	ENSG00000124588.19	NQO2	Fall	0	9
CHEMBL476968	ENSG00000124588.19	NQO2	Spring	8	0
TAMSULOSIN	ENSG00000100197.20	CYP2D6	Fall	6	0
PONATINIB	ENSG00000186716.20	BCR	Spring	0	6
RHEIN	ENSG00000101751.10	POLI	Summer	0	6
FINGOLIMOD	ENSG00000170989.8	S1PR1	Fall	8	1
FINGOLIMOD	ENSG00000170989.8	S1PR1	Spring	0	6
FUROSEMIDE	ENSG00000111664.10	GNB3	Summer	6	0
FUROSEMIDE	ENSG00000111664.10	GNB3	Winter	0	7
CHEMBL1503729	ENSG00000166851.14	PLK1	Fall	9	0
APREMILAST	ENSG00000184588.17	PDE4B	Summer	6	0
TETRAIDOFLUORESCEIN	ENSG00000101751.10	POLI	Summer	0	6
GENTIAN VIOLET	ENSG00000142192.20	APP	Summer	7	0
CHEMBL478754	ENSG00000101751.10	POLI	Summer	0	6
GRACILIN J	ENSG00000146648.17	EGFR	Summer	0	6
CYCLOSPORINE	ENSG00000203747.10	FCGR3A	Fall	6	1
AMINOPHYLLINE	ENSG00000065989.15	PDE4A	Spring	6	0
AMISELIMOD HYDROCHLORIDE	ENSG00000170989.8	S1PR1	Fall	8	1
AMISELIMOD HYDROCHLORIDE	ENSG00000170989.8	S1PR1	Spring	0	6
BEXAROTENE	ENSG00000108773.10	KAT2A	Summer	0	6
ABEXINOSTAT	ENSG00000048052.21	HDAC9	Fall	0	6
CHEMBL471225	ENSG00000100644.16	HIF1A	Fall	6	0
CHEMBL471225	ENSG00000100644.16	HIF1A	Spring	1	8
TESTOSTERONE	ENSG00000042088.13	TDP1	Winter	7	0
METHOXSALEN	ENSG00000100197.20	CYP2D6	Fall	6	0
PODOFILOX	ENSG00000137285.9	TUBB2B	Fall	8	0
REVERSETRIIODOTHYRONINE	ENSG00000108773.10	KAT2A	Summer	0	6
RIVASTIGMINE	ENSG00000114200.9	BCHE	Summer	8	2
AXITINIB	ENSG00000102755.11	FLT1	Winter	1	8
QUETIAPINE	ENSG00000100197.20	CYP2D6	Fall	6	0
L-21649	ENSG00000102755.11	FLT1	Winter	1	8
SCLEROTIORIN	ENSG00000101751.10	POLI	Summer	0	6
NV-128	ENSG00000131495.8	NDUFA2	Fall	0	6
RG-1530	ENSG00000176444.18	CLK2	Fall	6	0
METHYLPHENIDATE	ENSG00000185615.15	PDIA2	Winter	0	7
CYC-116	ENSG00000176444.18	CLK2	Fall	6	0
R-406	ENSG00000146648.17	EGFR	Summer	0	6
AZD-1080	ENSG00000164543.5	STK17A	Summer	6	2
TAK-715	ENSG00000146648.17	EGFR	Summer	0	6
PITOLISANT	ENSG00000100197.20	CYP2D6	Fall	6	0
TRIAMTERENE	ENSG00000106211.8	HSPB1	Fall	10	0
TRIAMTERENE	ENSG00000106211.8	HSPB1	Winter	0	13
UREA	ENSG00000170606.14	HSPA4	Summer	6	0
CEPHAPIRIN SODIUM	ENSG00000185513.14	L3MBTL1	Fall	6	0
CEPHAPIRIN SODIUM	ENSG00000185513.14	L3MBTL1	Summer	0	6
CER-002	ENSG00000112033.13	PPARD	Fall	6	0
CHEMBL515252	ENSG00000116030.16	SUMO1	Fall	0	7
PEXMETINIB	ENSG00000102755.11	FLT1	Winter	1	8
ALEMTUZUMAB	ENSG00000169442.8	CD52	Fall	2	7
ALEMTUZUMAB	ENSG00000169442.8	CD52	Summer	8	4
CHEMBL292352	ENSG00000112033.13	PPARD	Fall	6	0
THONZONIUM	ENSG00000100197.20	CYP2D6	Fall	6	0
DISULFIRAM	ENSG00000100031.18	GGT1	Summer	0	6
LEUCETTAMINE B	ENSG00000176444.18	CLK2	Fall	6	0
CYC-116	ENSG00000091436.16	MAP3K20	Spring	0	6
ALVERINE CITRATE	ENSG00000100197.20	CYP2D6	Fall	6	0
FUROSEMIDE	ENSG00000178623.11	GPR35	Fall	16	0
FUROSEMIDE	ENSG00000178623.11	GPR35	Winter	0	17
RALTITREXED	ENSG00000163631.16	ALB	Fall	0	8
RALTITREXED	ENSG00000163631.16	ALB	Summer	10	0
SAPITINIB	ENSG00000146648.17	EGFR	Summer	0	6
GEFITINIB	ENSG00000099875.14	MKNK2	Fall	8	0
GEFITINIB	ENSG00000099875.14	MKNK2	Winter	1	7
THEOPHYLLINE	ENSG00000184588.17	PDE4B	Summer	6	0
BUTANOIC ACID	ENSG00000061273.17	HDAC7	Fall	12	0
SERTRALINE	ENSG00000111664.10	GNB3	Summer	6	0
SERTRALINE	ENSG00000111664.10	GNB3	Winter	0	7
TRAMETINIB	ENSG00000034152.18	MAP2K3	Fall	7	3
TRAMETINIB	ENSG00000034152.18	MAP2K3	Winter	1	11
VALPROIC ACID	ENSG00000100197.20	CYP2D6	Fall	6	0
ACIVICIN	ENSG00000198959.11	TGM2	Fall	7	0
ACIVICIN	ENSG00000198959.11	TGM2	Spring	0	6
MEPTAZINOL	ENSG00000114200.9	BCHE	Summer	8	2
BRENTUXIMAB VEDOTIN	ENSG00000176014.12	TUBB6	Winter	3	8
TYRPHOSTIN A9	ENSG00000100644.16	HIF1A	Fall	6	0
TYRPHOSTIN A9	ENSG00000100644.16	HIF1A	Spring	1	8
CHEMBL153057	ENSG00000112033.13	PPARD	Fall	6	0
ERYTHROMYCIN	ENSG00000100197.20	CYP2D6	Fall	6	0
DEGUELIN	ENSG00000100197.20	CYP2D6	Fall	6	0
CELECOXIB	ENSG00000168610.14	STAT3	Spring	0	6
LOMETREXOL	ENSG00000147224.10	PRPS1	Fall	1	7
BENPERIDOL	ENSG00000100197.20	CYP2D6	Fall	6	0
HISTAMINE	ENSG00000160789.19	LMNA	Winter	0	6
CAPSAICIN	ENSG00000196689.11	TRPV1	Fall	10	0
RESINIFERATOXIN	ENSG00000196689.11	TRPV1	Fall	10	0
METHOCARBAMOL	ENSG00000100197.20	CYP2D6	Fall	6	0
UREA	ENSG00000106211.8	HSPB1	Fall	10	0
UREA	ENSG00000106211.8	HSPB1	Winter	0	13
BUFLOMEDIL	ENSG00000100197.20	CYP2D6	Fall	6	0
9,10-PHENANTHRENEQUINONE	ENSG00000101751.10	POLI	Summer	0	6
ECULIZUMAB	ENSG00000106804.7	C5	Summer	0	8
DESIPRAMINE	ENSG00000090534.17	THPO	Fall	6	0
ALITRETINOIN	ENSG00000131759.17	RARA	Winter	0	7
CUDC-101	ENSG00000048052.21	HDAC9	Fall	0	6
APIXABAN	ENSG00000126218.11	F10	Summer	6	0
CHEMBL379975	ENSG00000130669.17	PAK4	Fall	6	0
FERRUGINENE B	ENSG00000196689.11	TRPV1	Fall	10	0
FURAMIDINE	ENSG00000101751.10	POLI	Summer	0	6
SB-705498	ENSG00000196689.11	TRPV1	Fall	10	0
REPOTRECTINIB	ENSG00000148053.15	NTRK2	Summer	6	1
NIVOLUMAB	ENSG00000117713.18	ARID1A	Fall	10	0
NIVOLUMAB	ENSG00000117713.18	ARID1A	Spring	0	6
CLOTRIMAZOLE	ENSG00000112033.13	PPARD	Fall	6	0
CHEMBL234338	ENSG00000101751.10	POLI	Summer	0	6
FOLIC ACID	ENSG00000165457.13	FOLR2	Spring	6	0
FLUSPIRILENE	ENSG00000100219.16	XBP1	Summer	7	0
LANSOPRAZOLE	ENSG00000166851.14	PLK1	Fall	9	0
STROBOPININ	ENSG00000044574.7	HSPA5	Summer	7	0
QUISINOSTAT	ENSG00000100429.17	HDAC10	Fall	10	0
PAZOPANIB	ENSG00000102755.11	FLT1	Winter	1	8
AZATHIOPRINE	ENSG00000128059.8	PPAT	Spring	0	7
DICLOFENAC	ENSG00000213199.7	ASIC3	Fall	6	0
TALABOSTAT	ENSG00000142002.16	DPP9	Fall	6	0
VANOXERINE	ENSG00000090534.17	THPO	Fall	6	0
DIPYRIDAMOLE	ENSG00000100197.20	CYP2D6	Fall	6	0
TROVAFLOXACIN MESYLATE	ENSG00000112033.13	PPARD	Fall	6	0
QUERCETIN	ENSG00000106211.8	HSPB1	Fall	10	0
QUERCETIN	ENSG00000106211.8	HSPB1	Winter	0	13
AGROCLAVINE	ENSG00000100197.20	CYP2D6	Fall	6	0
PAROXETINE	ENSG00000100197.20	CYP2D6	Fall	6	0
SORAFENIB	ENSG00000102755.11	FLT1	Winter	1	8
REGORAFENIB	ENSG00000102755.11	FLT1	Winter	1	8
SUNITINIB	ENSG00000102755.11	FLT1	Winter	1	8
BUTYRYLHYDROXAMIC ACID	ENSG00000100429.17	HDAC10	Fall	10	0
GRAMINE	ENSG00000100197.20	CYP2D6	Fall	6	0
SIPONIMOD	ENSG00000170989.8	S1PR1	Fall	8	1
SIPONIMOD	ENSG00000170989.8	S1PR1	Spring	0	6
OZANEZUMAB	ENSG00000115310.17	RTN4	Fall	0	10
LY-2090314	ENSG00000198355.4	PIM3	Fall	7	0
LY-2090314	ENSG00000198355.4	PIM3	Winter	1	9
AVE0847	ENSG00000112033.13	PPARD	Fall	6	0
SELEGILINE	ENSG00000100197.20	CYP2D6	Fall	6	0
TG100-801	ENSG00000000938.12	FGR	Fall	9	0
TRAMADOL	ENSG00000141480.17	ARRB2	Summer	0	6
PX-478	ENSG00000100644.16	HIF1A	Fall	6	0
PX-478	ENSG00000100644.16	HIF1A	Spring	1	8
ALCOHOL	ENSG00000112033.13	PPARD	Fall	6	0
JNJ-5207852	ENSG00000002016.17	RAD52	Fall	6	0
CHEMBL596633	ENSG00000002016.17	RAD52	Fall	6	0
RADANAMYCIN	ENSG00000096384.19	HSP90AB1	Summer	6	0
PD-0166285	ENSG00000130669.17	PAK4	Fall	6	0
IPATASERTIB	ENSG00000105221.16	AKT2	Fall	9	0
CHEMBL581044	ENSG00000161800.12	RACGAP1	Spring	8	1
CHEMBL555260	ENSG00000166851.14	PLK1	Fall	9	0
APATORSEN	ENSG00000106211.8	HSPB1	Fall	10	0
APATORSEN	ENSG00000106211.8	HSPB1	Winter	0	13
GRC-15300	ENSG00000196689.11	TRPV1	Fall	10	0
PIMETHIXENE	ENSG00000100197.20	CYP2D6	Fall	6	0
NAPROXEN ETEMESIL	ENSG00000073756.11	PTGS2	Summer	7	0
ATENOLOL	ENSG00000073756.11	PTGS2	Summer	7	0
METHYLPHENIDATE	ENSG00000093010.13	COMT	Fall	7	0
AZITHROMYCIN	ENSG00000100197.20	CYP2D6	Fall	6	0
ALCOHOL	ENSG00000160255.17	ITGB2	Summer	0	7
TRAMETINIB	ENSG00000079432.7	CIC	Fall	7	0
CEDIRANIB	ENSG00000102755.11	FLT1	Winter	1	8
MECLOFENAMATE SODIUM	ENSG00000073756.11	PTGS2	Summer	7	0
KAEMPFEROL	ENSG00000161800.12	RACGAP1	Spring	8	1
CHEMBL123904	ENSG00000100197.20	CYP2D6	Fall	6	0
CHEMBL3397300	ENSG00000146648.17	EGFR	Summer	0	6
TERFENADINE	ENSG00000090534.17	THPO	Fall	6	0
CELECOXIB	ENSG00000074410.13	CA12	Fall	7	0
RAMUCIRUMAB	ENSG00000146648.17	EGFR	Summer	0	6
CHEMBL2005186	ENSG00000164543.5	STK17A	Summer	6	2
CISPLATIN	ENSG00000109971.13	HSPA8	Summer	8	0
WIN-552122	ENSG00000090534.17	THPO	Fall	6	0
OPICAPONE	ENSG00000093010.13	COMT	Fall	7	0
MESALAMINE	ENSG00000012779.10	ALOX5	Summer	0	8
VORINOSTAT	ENSG00000061273.17	HDAC7	Fall	12	0
MEPIVACAINE	ENSG00000100197.20	CYP2D6	Fall	6	0
ASARININ	ENSG00000100197.20	CYP2D6	Fall	6	0
SOTRASTAURIN	ENSG00000166851.14	PLK1	Fall	9	0
OXAPROZIN	ENSG00000073756.11	PTGS2	Summer	7	0
CHEMBL1362503	ENSG00000166851.14	PLK1	Fall	9	0
CHEMBL416038	ENSG00000012779.10	ALOX5	Summer	0	8
ALPHAPRODINE HYDROCHLORIDE	ENSG00000166851.14	PLK1	Fall	9	0
CHEMBL1079460	ENSG00000100197.20	CYP2D6	Fall	6	0
CHEMBL261454	ENSG00000213923.11	CSNK1E	Fall	8	0
SULFASALAZINE	ENSG00000112149.9	CD83	Winter	1	7
CHEMBL535331	ENSG00000091436.16	MAP3K20	Spring	0	6
CHEMBL578719	ENSG00000002016.17	RAD52	Fall	6	0
NIMOTUZUMAB	ENSG00000146648.17	EGFR	Summer	0	6
LCL-161	ENSG00000101966.12	XIAP	Spring	0	6
OPROZOMIB	ENSG00000115233.11	PSMD14	Fall	0	7
POLYGODIAL	ENSG00000196689.11	TRPV1	Fall	10	0
CUDC-101	ENSG00000061273.17	HDAC7	Fall	12	0
GERONTOXANTHONE A	ENSG00000131759.17	RARA	Winter	0	7
RECILISIB	ENSG00000051382.8	PIK3CB	Fall	0	9
DARBEPOETIN ALFA	ENSG00000187266.13	EPOR	Winter	0	6
ABEXINOSTAT	ENSG00000061273.17	HDAC7	Fall	12	0
CHEMBL1287867	ENSG00000124588.19	NQO2	Fall	0	9
CHEMBL1287867	ENSG00000124588.19	NQO2	Spring	8	0
OSIMERTINIB	ENSG00000146648.17	EGFR	Summer	0	6
CIBINETIDE	ENSG00000187266.13	EPOR	Winter	0	6
AZD-1480	ENSG00000168610.14	STAT3	Spring	0	6
TOLCAPONE	ENSG00000093010.13	COMT	Fall	7	0
CHEMBL191534	ENSG00000196689.11	TRPV1	Fall	10	0
CEPHALOCHROMIN	ENSG00000101751.10	POLI	Summer	0	6
CHEMBL504559	ENSG00000101966.12	XIAP	Spring	0	6
TAK-285	ENSG00000146648.17	EGFR	Summer	0	6
PIMOZIDE	ENSG00000100644.16	HIF1A	Fall	6	0
PIMOZIDE	ENSG00000100644.16	HIF1A	Spring	1	8
VANDETANIB	ENSG00000146648.17	EGFR	Summer	0	6
NILOTINIB	ENSG00000186716.20	BCR	Spring	0	6
(R)-FLECAINIDE	ENSG00000100197.20	CYP2D6	Fall	6	0
BAICALEIN	ENSG00000185513.14	L3MBTL1	Fall	6	0
BAICALEIN	ENSG00000185513.14	L3MBTL1	Summer	0	6
DIAZOXIDE	ENSG00000100197.20	CYP2D6	Fall	6	0
GW843682X	ENSG00000166851.14	PLK1	Fall	9	0
PILARALISIB	ENSG00000051382.8	PIK3CB	Fall	0	9
TESEVATINIB	ENSG00000102755.11	FLT1	Winter	1	8
PACLITAXEL	ENSG00000175197.11	DDIT3	Winter	0	6
CHEMBL406557	ENSG00000077150.18	NFKB2	Fall	11	0
CHEMBL406557	ENSG00000077150.18	NFKB2	Winter	0	6
CLOTRIMAZOLE	ENSG00000100197.20	CYP2D6	Fall	6	0
KETOPROFEN	ENSG00000073756.11	PTGS2	Summer	7	0
OLVANIL	ENSG00000196689.11	TRPV1	Fall	10	0
HOMIDIUM BROMIDE	ENSG00000101751.10	POLI	Summer	0	6
HAEMATOXYLIN	ENSG00000166851.14	PLK1	Fall	9	0
VOXTALISIB	ENSG00000118046.14	STK11	Fall	6	0
COLCHICINE	ENSG00000176014.12	TUBB6	Winter	3	8
OXYPHENBUTAZONE	ENSG00000073756.11	PTGS2	Summer	7	0
CHEMBL365617	ENSG00000105287.12	PRKD2	Fall	7	0
PILOCARPINE	ENSG00000148053.15	NTRK2	Summer	6	1
LAVENDUSTIN B	ENSG00000101751.10	POLI	Summer	0	6
THALIDOMIDE	ENSG00000073756.11	PTGS2	Summer	7	0
DURVALUMAB	ENSG00000146648.17	EGFR	Summer	0	6
MP-412	ENSG00000146648.17	EGFR	Summer	0	6
CHEMBL524376	ENSG00000044574.7	HSPA5	Summer	7	0
PEMBROLIZUMAB	ENSG00000146648.17	EGFR	Summer	0	6
TASELISIB	ENSG00000051382.8	PIK3CB	Fall	0	9
CHEMBL577887	ENSG00000002016.17	RAD52	Fall	6	0
ELLIPTECINE	ENSG00000042088.13	TDP1	Winter	7	0
EPINEPHRINE	ENSG00000068001.13	HYAL2	Fall	9	0
EPINEPHRINE	ENSG00000068001.13	HYAL2	Winter	0	7
AC-480	ENSG00000146648.17	EGFR	Summer	0	6
PHENANTHROLINE	ENSG00000106211.8	HSPB1	Fall	10	0
PHENANTHROLINE	ENSG00000106211.8	HSPB1	Winter	0	13
TOZASERTIB	ENSG00000118046.14	STK11	Fall	6	0
ACETALDEHYDE	ENSG00000196616.13	ADH1B	Summer	0	8
CHEMBL188762	ENSG00000146648.17	EGFR	Summer	0	6
SURAMIN	ENSG00000051382.8	PIK3CB	Fall	0	9
TANOGITRAN	ENSG00000126218.11	F10	Summer	6	0
CHEMBL1519374	ENSG00000166851.14	PLK1	Fall	9	0
IDAZOXAN	ENSG00000112033.13	PPARD	Fall	6	0
FLUSPIRILENE	ENSG00000112033.13	PPARD	Fall	6	0
ELLIPTECINE	ENSG00000100197.20	CYP2D6	Fall	6	0
VARLITINIB	ENSG00000146648.17	EGFR	Summer	0	6
SURAMIN	ENSG00000175197.11	DDIT3	Winter	0	6
ZALUTUMUMAB	ENSG00000146648.17	EGFR	Summer	0	6
CHEMBL429095	ENSG00000100197.20	CYP2D6	Fall	6	0
DICLOFENAC	ENSG00000175197.11	DDIT3	Winter	0	6
PENTOSALEN	ENSG00000166851.14	PLK1	Fall	9	0
TRIMETHOPRIM/SULFADOXINE	ENSG00000126218.11	F10	Summer	6	0
ILORASERTIB	ENSG00000164543.5	STK17A	Summer	6	2
DENBUFYLLINE	ENSG00000184588.17	PDE4B	Summer	6	0
CHEMBL35482	ENSG00000148926.9	ADM	Winter	0	12
RUCAPARIB	ENSG00000105287.12	PRKD2	Fall	7	0
DIMETHYL SULFOXIDE	ENSG00000131759.17	RARA	Winter	0	7
CHEMBL182310	ENSG00000108773.10	KAT2A	Summer	0	6
TELATINIB	ENSG00000102755.11	FLT1	Winter	1	8
CARBOPLATIN	ENSG00000146648.17	EGFR	Summer	0	6
FENRETINIDE	ENSG00000131759.17	RARA	Winter	0	7
TOFACITINIB	ENSG00000126561.16	STAT5A	Fall	6	0
AZACITIDINE	ENSG00000090534.17	THPO	Fall	6	0
GYROPHORIC ACID	ENSG00000166851.14	PLK1	Fall	9	0
CHEMBL610767	ENSG00000112033.13	PPARD	Fall	6	0
BECLOMETHASONE	ENSG00000100644.16	HIF1A	Fall	6	0
BECLOMETHASONE	ENSG00000100644.16	HIF1A	Spring	1	8
TAE-684	ENSG00000130669.17	PAK4	Fall	6	0
QUERCITRIN	ENSG00000101751.10	POLI	Summer	0	6
GELDANAMYCIN	ENSG00000100644.16	HIF1A	Fall	6	0
GELDANAMYCIN	ENSG00000100644.16	HIF1A	Spring	1	8
DAUNORUBICIN	ENSG00000061273.17	HDAC7	Fall	12	0
IMGATUZUMAB	ENSG00000146648.17	EGFR	Summer	0	6
SELINEXOR	ENSG00000082898.16	XPO1	Spring	0	6
BORTEZOMIB	ENSG00000277791.4	PSMB3	Fall	1	6
CYCLOSTREPTIN	ENSG00000137285.9	TUBB2B	Fall	8	0
MOCETINOSTAT	ENSG00000048052.21	HDAC9	Fall	0	6
MK-2206	ENSG00000146648.17	EGFR	Summer	0	6
TOLPERISONE	ENSG00000100197.20	CYP2D6	Fall	6	0
SB-224289	ENSG00000100197.20	CYP2D6	Fall	6	0
INDOMETHACIN	ENSG00000073756.11	PTGS2	Summer	7	0
CHEMBL541400	ENSG00000176444.18	CLK2	Fall	6	0
EDASALONEXENT	ENSG00000077150.18	NFKB2	Fall	11	0
EDASALONEXENT	ENSG00000077150.18	NFKB2	Winter	0	6
CAMPTOTHECIN	ENSG00000100644.16	HIF1A	Fall	6	0
CAMPTOTHECIN	ENSG00000100644.16	HIF1A	Spring	1	8
ZOXAZOLAMINE	ENSG00000100197.20	CYP2D6	Fall	6	0
PIROXICAM	ENSG00000073756.11	PTGS2	Summer	7	0
BIRABRESIB	ENSG00000141867.17	BRD4	Fall	9	0
BIRABRESIB	ENSG00000141867.17	BRD4	Spring	0	7
BIRABRESIB	ENSG00000141867.17	BRD4	Winter	0	6
CHLORHEXIDINE	ENSG00000002016.17	RAD52	Fall	6	0
GAMBOGIC ACID	ENSG00000096384.19	HSP90AB1	Summer	6	0
CLOPIDOGREL	ENSG00000164867.10	NOS3	Fall	8	2
CLOPIDOGREL	ENSG00000164867.10	NOS3	Winter	0	9
SULINDAC	ENSG00000073756.11	PTGS2	Summer	7	0
PHYSODIC ACID	ENSG00000166851.14	PLK1	Fall	9	0
ATEZOLIZUMAB	ENSG00000118046.14	STK11	Fall	6	0
CHEMBL535307	ENSG00000161800.12	RACGAP1	Spring	8	1
CHEMBL1585652	ENSG00000164128.6	NPY1R	Fall	0	7
BUPARLISIB	ENSG00000051382.8	PIK3CB	Fall	0	9
ACETAMINOPHEN	ENSG00000073756.11	PTGS2	Summer	7	0
RILOPIROX	ENSG00000012779.10	ALOX5	Summer	0	8
DEPHOSTATIN	ENSG00000101751.10	POLI	Summer	0	6
EMICIZUMAB	ENSG00000126218.11	F10	Summer	6	0
TAMIBAROTENE	ENSG00000131759.17	RARA	Winter	0	7
ANAZOLENE	ENSG00000108773.10	KAT2A	Summer	0	6
AN-9	ENSG00000061273.17	HDAC7	Fall	12	0
ETRETINATE	ENSG00000077092.18	RARB	Fall	0	6
SUNITINIB	ENSG00000164867.10	NOS3	Fall	8	2
SUNITINIB	ENSG00000164867.10	NOS3	Winter	0	9
CHEMBL1448793	ENSG00000116030.16	SUMO1	Fall	0	7
3-O-METHYLQUERCETIN	ENSG00000101751.10	POLI	Summer	0	6
AST-487	ENSG00000148053.15	NTRK2	Summer	6	1
CYANOPEPTOLIN SS	ENSG00000010438.16	PRSS3	Fall	0	6
QUINAPRIL	ENSG00000135744.7	AGT	Fall	7	0
CHEMBL375293	ENSG00000091436.16	MAP3K20	Spring	0	6
PIMASERTIB	ENSG00000146648.17	EGFR	Summer	0	6
CLADRIBINE	ENSG00000101966.12	XIAP	Spring	0	6
TOZASERTIB	ENSG00000142627.12	EPHA2	Winter	0	8
PROTOPORPHYRIN	ENSG00000042088.13	TDP1	Winter	7	0
BUTYRYLHYDROXAMIC ACID	ENSG00000048052.21	HDAC9	Fall	0	6
DASATINIB	ENSG00000117713.18	ARID1A	Fall	10	0
DASATINIB	ENSG00000117713.18	ARID1A	Spring	0	6
CHEMBL1394328	ENSG00000100197.20	CYP2D6	Fall	6	0
LOVASTATIN	ENSG00000100197.20	CYP2D6	Fall	6	0
APABETALONE	ENSG00000141867.17	BRD4	Fall	9	0
APABETALONE	ENSG00000141867.17	BRD4	Spring	0	7
APABETALONE	ENSG00000141867.17	BRD4	Winter	0	6
BROMFENAC SODIUM	ENSG00000073756.11	PTGS2	Summer	7	0
CHEMBL435278	ENSG00000112033.13	PPARD	Fall	6	0
LITHOGLYCOCHOLATE	ENSG00000142627.12	EPHA2	Winter	0	8
CHEMBL1527	ENSG00000101751.10	POLI	Summer	0	6
RESMINOSTAT	ENSG00000100429.17	HDAC10	Fall	10	0
ELIGLUSTAT	ENSG00000100197.20	CYP2D6	Fall	6	0
ETHINYL ESTRADIOL	ENSG00000100197.20	CYP2D6	Fall	6	0
CHEMBL498513	ENSG00000161800.12	RACGAP1	Spring	8	1
CARBAMAZEPINE	ENSG00000204469.12	PRRC2A	Fall	6	0
CHEMBL598663	ENSG00000101751.10	POLI	Summer	0	6
ORTHO-PHTHALALDEHYDE	ENSG00000042088.13	TDP1	Winter	7	0
ERBSTATIN	ENSG00000185513.14	L3MBTL1	Fall	6	0
ERBSTATIN	ENSG00000185513.14	L3MBTL1	Summer	0	6
ABIETIC ACID	ENSG00000131759.17	RARA	Winter	0	7
CISPLATIN	ENSG00000118046.14	STK11	Fall	6	0
COUMESTROL	ENSG00000161800.12	RACGAP1	Spring	8	1
DOCETAXEL	ENSG00000146648.17	EGFR	Summer	0	6
HYDROCORTISONE	ENSG00000100644.16	HIF1A	Fall	6	0
HYDROCORTISONE	ENSG00000100644.16	HIF1A	Spring	1	8
SUNITINIB MALATE	ENSG00000102755.11	FLT1	Winter	1	8
GSK933776	ENSG00000142192.20	APP	Summer	7	0
ROCILETINIB	ENSG00000146648.17	EGFR	Summer	0	6
PICTILISIB	ENSG00000133056.13	PIK3C2B	Summer	6	1
SB-431542	ENSG00000100197.20	CYP2D6	Fall	6	0
CHEMBL19954	ENSG00000101751.10	POLI	Summer	0	6
ERLOTINIB	ENSG00000146648.17	EGFR	Summer	0	6
OTAMIXABAN	ENSG00000126218.11	F10	Summer	6	0
KETOTIFEN	ENSG00000100197.20	CYP2D6	Fall	6	0
SIMAZINE	ENSG00000108773.10	KAT2A	Summer	0	6
PENFLURIDOL	ENSG00000112033.13	PPARD	Fall	6	0
TOLONIUM CHLORIDE	ENSG00000101751.10	POLI	Summer	0	6
CEFOTAXIME SODIUM	ENSG00000101751.10	POLI	Summer	0	6
PROPAFENONE	ENSG00000100197.20	CYP2D6	Fall	6	0
DECITABINE	ENSG00000146648.17	EGFR	Summer	0	6
CHEMBL458328	ENSG00000108773.10	KAT2A	Summer	0	6
SULFURETIN	ENSG00000161800.12	RACGAP1	Spring	8	1
SIROLIMUS	ENSG00000127948.15	POR	Fall	9	0
SIROLIMUS	ENSG00000127948.15	POR	Spring	0	8
ZOTIRACICLIB	ENSG00000250506.7	CDK3	Fall	7	0
CODEINE	ENSG00000100197.20	CYP2D6	Fall	6	0
LINOLENIC ACID	ENSG00000108773.10	KAT2A	Summer	0	6
BALSALAZIDE	ENSG00000073756.11	PTGS2	Summer	7	0
TRIBROMSALAN	ENSG00000112033.13	PPARD	Fall	6	0
NIVOLUMAB	ENSG00000146648.17	EGFR	Summer	0	6
SAPANISERTIB	ENSG00000118046.14	STK11	Fall	6	0
CRENEZUMAB	ENSG00000142192.20	APP	Summer	7	0
NIVOLUMAB	ENSG00000198625.12	MDM4	Fall	7	0
NIVOLUMAB	ENSG00000198625.12	MDM4	Spring	0	6
SONOLISIB	ENSG00000051382.8	PIK3CB	Fall	0	9
PHE377	ENSG00000196689.11	TRPV1	Fall	10	0
ADAPALENE	ENSG00000131759.17	RARA	Winter	0	7
TACROLIMUS	ENSG00000142330.19	CAPN10	Fall	6	0
THALIDOMIDE	ENSG00000100387.8	RBX1	Fall	0	6
THALIDOMIDE	ENSG00000100387.8	RBX1	Spring	6	0
ISO-IANTHERAN A	ENSG00000244165.1	P2RY11	Fall	9	0
GIVINOSTAT	ENSG00000061273.17	HDAC7	Fall	12	0
HYCANTHONE	ENSG00000002016.17	RAD52	Fall	6	0
BROMAZEPAM	ENSG00000100197.20	CYP2D6	Fall	6	0
CHEMBL1448793	ENSG00000161800.12	RACGAP1	Spring	8	1
GEDATOLISIB	ENSG00000133056.13	PIK3C2B	Summer	6	1
CHEMBL1935538	ENSG00000137285.9	TUBB2B	Fall	8	0
CYC-116	ENSG00000061938.16	TNK2	Fall	6	0
THEOPHYLLINE	ENSG00000065989.15	PDE4A	Spring	6	0
CHEMBL1795737	ENSG00000137285.9	TUBB2B	Fall	8	0
PROPIONYLPROMAZINE HYDROCHLORIDE	ENSG00000002016.17	RAD52	Fall	6	0
PROGESTERONE	ENSG00000109861.15	CTSC	Summer	6	0
CHEMBL1707907	ENSG00000166851.14	PLK1	Fall	9	0
CHEMBL587449	ENSG00000166851.14	PLK1	Fall	9	0
IDRAPARINUX SODIUM	ENSG00000126218.11	F10	Summer	6	0
TAXIFOLIN	ENSG00000101751.10	POLI	Summer	0	6
CHEMBL583824	ENSG00000002016.17	RAD52	Fall	6	0
CHEMBL2094789	ENSG00000077150.18	NFKB2	Fall	11	0
CHEMBL2094789	ENSG00000077150.18	NFKB2	Winter	0	6
DIHYDROSPINGOSINE	ENSG00000100197.20	CYP2D6	Fall	6	0
NINTEDANIB	ENSG00000000938.12	FGR	Fall	9	0
FENTANYL	ENSG00000141480.17	ARRB2	Summer	0	6
CHEMBL522887	ENSG00000002016.17	RAD52	Fall	6	0
GEMCITABINE HYDROCHLORIDE	ENSG00000062822.12	POLD1	Fall	6	0
CHEMBL586031	ENSG00000011304.19	PTBP1	Fall	6	1
GSK-2636771	ENSG00000051382.8	PIK3CB	Fall	0	9
PHENOXYBENZAMINE	ENSG00000100197.20	CYP2D6	Fall	6	0
CHEMBL609628	ENSG00000100197.20	CYP2D6	Fall	6	0
OUABAIN	ENSG00000168610.14	STAT3	Spring	0	6
CHEMBL606456	ENSG00000002016.17	RAD52	Fall	6	0
DOCEBENONE	ENSG00000100197.20	CYP2D6	Fall	6	0
SCOULERINE	ENSG00000101751.10	POLI	Summer	0	6
PROPOXYCAINE	ENSG00000100197.20	CYP2D6	Fall	6	0
DIMETHYLCURCUMIN	ENSG00000146648.17	EGFR	Summer	0	6
CHEMBL1257092	ENSG00000101751.10	POLI	Summer	0	6
DULANERMIN	ENSG00000120889.12	TNFRSF10B	Fall	8	0
ENTACAPONE	ENSG00000093010.13	COMT	Fall	7	0
TRICHOSTATIN	ENSG00000061273.17	HDAC7	Fall	12	0
LAQUINIMOD	ENSG00000077150.18	NFKB2	Fall	11	0
LAQUINIMOD	ENSG00000077150.18	NFKB2	Winter	0	6
DOCETAXEL	ENSG00000140332.15	TLE3	Fall	7	1
CHEMBL1287866	ENSG00000124588.19	NQO2	Fall	0	9
CHEMBL1287866	ENSG00000124588.19	NQO2	Spring	8	0
CHEMBL592652	ENSG00000112033.13	PPARD	Fall	6	0
FLUVOXAMINE	ENSG00000100197.20	CYP2D6	Fall	6	0
CHEMBL95704	ENSG00000161800.12	RACGAP1	Spring	8	1
RHEIN	ENSG00000096384.19	HSP90AB1	Summer	6	0
CYC-116	ENSG00000130669.17	PAK4	Fall	6	0
DOXORUBICIN	ENSG00000164867.10	NOS3	Fall	8	2
DOXORUBICIN	ENSG00000164867.10	NOS3	Winter	0	9
MOTESANIB	ENSG00000102755.11	FLT1	Winter	1	8
MR-1817	ENSG00000196689.11	TRPV1	Fall	10	0
PARTHENOLIDE	ENSG00000077150.18	NFKB2	Fall	11	0
PARTHENOLIDE	ENSG00000077150.18	NFKB2	Winter	0	6
OMECAMTIV MECARBIL	ENSG00000092054.12	MYH7	Winter	0	7
CHEMBL1408276	ENSG00000162551.13	ALPL	Fall	6	0
QUERCETAGETIN	ENSG00000077150.18	NFKB2	Fall	11	0
QUERCETAGETIN	ENSG00000077150.18	NFKB2	Winter	0	6
ADAPALENE	ENSG00000077092.18	RARB	Fall	0	6
ZILEUTON	ENSG00000012779.10	ALOX5	Summer	0	8
LAUROGUADINE	ENSG00000105287.12	PRKD2	Fall	7	0
AFAMELANOTIDE	ENSG00000258839.3	MC1R	Fall	14	0
AFAMELANOTIDE	ENSG00000258839.3	MC1R	Spring	0	9
CHEMBL462314	ENSG00000101751.10	POLI	Summer	0	6
DOMPERIDONE	ENSG00000100197.20	CYP2D6	Fall	6	0
PIRIBEDIL	ENSG00000100197.20	CYP2D6	Fall	6	0
TRIAMTERENE	ENSG00000112033.13	PPARD	Fall	6	0
SULFASALAZINE	ENSG00000100644.16	HIF1A	Fall	6	0
SULFASALAZINE	ENSG00000100644.16	HIF1A	Spring	1	8
TRICIRIBINE	ENSG00000105221.16	AKT2	Fall	9	0
AG-13958	ENSG00000102755.11	FLT1	Winter	1	8
DYPHYLLINE	ENSG00000065989.15	PDE4A	Spring	6	0
BARDOXOLONE METHYL	ENSG00000168610.14	STAT3	Spring	0	6
NORGESTREL	ENSG00000044574.7	HSPA5	Summer	7	0
CIMICOXIB	ENSG00000073756.11	PTGS2	Summer	7	0
GEMFIBROZIL	ENSG00000130164.13	LDLR	Fall	10	0
GEMFIBROZIL	ENSG00000130164.13	LDLR	Winter	1	7
AZD-7451	ENSG00000148053.15	NTRK2	Summer	6	1
ROQUINIMEX	ENSG00000115386.5	REG1A	Spring	7	0
SULFASALAZINE	ENSG00000012779.10	ALOX5	Summer	0	8
EVOLOCUMAB	ENSG00000130164.13	LDLR	Fall	10	0
EVOLOCUMAB	ENSG00000130164.13	LDLR	Winter	1	7
CYC-116	ENSG00000188130.13	MAPK12	Fall	6	0
CYC-116	ENSG00000188130.13	MAPK12	Summer	0	6
TIVOZANIB	ENSG00000102755.11	FLT1	Winter	1	8
GRANISETRON	ENSG00000100197.20	CYP2D6	Fall	6	0
LEVAMISOLE	ENSG00000198959.11	TGM2	Fall	7	0
LEVAMISOLE	ENSG00000198959.11	TGM2	Spring	0	6
MITOXANTRONE	ENSG00000002016.17	RAD52	Fall	6	0
CHEMBL1270169	ENSG00000185513.14	L3MBTL1	Fall	6	0
CHEMBL1270169	ENSG00000185513.14	L3MBTL1	Summer	0	6
PROTOAPIGENONE	ENSG00000101751.10	POLI	Summer	0	6
TOFIMILAST	ENSG00000065989.15	PDE4A	Spring	6	0
CHEMBL584442	ENSG00000002016.17	RAD52	Fall	6	0
DACTOLISIB	ENSG00000051382.8	PIK3CB	Fall	0	9
NIMESULIDE	ENSG00000042088.13	TDP1	Winter	7	0
GELDANAMYCIN	ENSG00000096384.19	HSP90AB1	Summer	6	0
CARFILZOMIB	ENSG00000100902.10	PSMA6	Summer	6	0
ALCOHOL	ENSG00000184588.17	PDE4B	Summer	6	0
IBUPROFEN LYSINE	ENSG00000073756.11	PTGS2	Summer	7	0
ETHINYL ESTRADIOL	ENSG00000075624.13	ACTB	Spring	0	6
DUVELISIB	ENSG00000051382.8	PIK3CB	Fall	0	9
TAMOXIFEN CITRATE	ENSG00000112033.13	PPARD	Fall	6	0
CHEMBL528694	ENSG00000077150.18	NFKB2	Fall	11	0
CHEMBL528694	ENSG00000077150.18	NFKB2	Winter	0	6
PHENOTHIAZINE	ENSG00000161800.12	RACGAP1	Spring	8	1
TAXOTERE	ENSG00000175197.11	DDIT3	Winter	0	6
HESPERETIN	ENSG00000100644.16	HIF1A	Fall	6	0
HESPERETIN	ENSG00000100644.16	HIF1A	Spring	1	8
(R,S)-INDATRALINE	ENSG00000100197.20	CYP2D6	Fall	6	0
BORTEZOMIB	ENSG00000077150.18	NFKB2	Fall	11	0
BORTEZOMIB	ENSG00000077150.18	NFKB2	Winter	0	6
SPIPERONE	ENSG00000100197.20	CYP2D6	Fall	6	0
ARFORMOTEROL	ENSG00000100197.20	CYP2D6	Fall	6	0
CETYLPYRIDINIUM BROMIDE	ENSG00000002016.17	RAD52	Fall	6	0
CHEMBL527307	ENSG00000143727.15	ACP1	Fall	0	6
SUXAMETHONIUM	ENSG00000114200.9	BCHE	Summer	8	2
ALLOPURINOL	ENSG00000100197.20	CYP2D6	Fall	6	0
CHEMBL1997335	ENSG00000176444.18	CLK2	Fall	6	0
ACETAZOLAMIDE SODIUM	ENSG00000074410.13	CA12	Fall	7	0
CHEMBL429095	ENSG00000101751.10	POLI	Summer	0	6
MYRICETIN	ENSG00000166851.14	PLK1	Fall	9	0
BRYOSTATIN	ENSG00000105287.12	PRKD2	Fall	7	0
CARVEDILOL	ENSG00000100197.20	CYP2D6	Fall	6	0
AMINOSALICYLATE POTASSIUM	ENSG00000073756.11	PTGS2	Summer	7	0
L19IL2	ENSG00000115414.18	FN1	Summer	10	0
MIDAZOLAM	ENSG00000198959.11	TGM2	Fall	7	0
MIDAZOLAM	ENSG00000198959.11	TGM2	Spring	0	6
SERABELISIB	ENSG00000051382.8	PIK3CB	Fall	0	9
CROMOLYN	ENSG00000100197.20	CYP2D6	Fall	6	0
LEVODOPA	ENSG00000123358.19	NR4A1	Winter	0	12
REVAMILAST	ENSG00000065989.15	PDE4A	Spring	6	0
ASTERRIC ACID	ENSG00000101751.10	POLI	Summer	0	6
DEXEFAROXAN	ENSG00000100197.20	CYP2D6	Fall	6	0
BELINOSTAT	ENSG00000100429.17	HDAC10	Fall	10	0
CENISERTIB	ENSG00000091436.16	MAP3K20	Spring	0	6
CHEMBL88147	ENSG00000100197.20	CYP2D6	Fall	6	0
CIGLITAZONE	ENSG00000168610.14	STAT3	Spring	0	6
HARMINE	ENSG00000176444.18	CLK2	Fall	6	0
CHEMBL512908	ENSG00000100197.20	CYP2D6	Fall	6	0
AMOXICILLIN	ENSG00000198502.5	HLA-DRB5	Spring	0	13
AMOXICILLIN	ENSG00000198502.5	HLA-DRB5	Summer	10	0
VATALANIB	ENSG00000146648.17	EGFR	Summer	0	6
ATEZOLIZUMAB	ENSG00000146648.17	EGFR	Summer	0	6
RETASPIMYCIN HYDROCHLORIDE	ENSG00000096384.19	HSP90AB1	Summer	6	0
ADIPHENINE	ENSG00000100197.20	CYP2D6	Fall	6	0
IXAZOMIB CITRATE	ENSG00000277791.4	PSMB3	Fall	1	6
ISOVELLERAL	ENSG00000100219.16	XBP1	Summer	7	0
PEGPLERANIB SODIUM	ENSG00000102755.11	FLT1	Winter	1	8
FOSBRETABULIN DISODIUM	ENSG00000176014.12	TUBB6	Winter	3	8
(-)-U-50488	ENSG00000100197.20	CYP2D6	Fall	6	0
RALOXIFENE	ENSG00000100197.20	CYP2D6	Fall	6	0
DEPATUXIZUMAB MAFODOTIN	ENSG00000146648.17	EGFR	Summer	0	6
(R)-MELPHALAN	ENSG00000100644.16	HIF1A	Fall	6	0
(R)-MELPHALAN	ENSG00000100644.16	HIF1A	Spring	1	8
TAMIBAROTENE	ENSG00000077092.18	RARB	Fall	0	6
GAMOLENIC ACID	ENSG00000108773.10	KAT2A	Summer	0	6
PF-03758309	ENSG00000130669.17	PAK4	Fall	6	0
DIMINAZENE	ENSG00000213199.7	ASIC3	Fall	6	0
CHEMBL480328	ENSG00000181222.15	POLR2A	Fall	8	0
CHEMBL480328	ENSG00000181222.15	POLR2A	Spring	0	10
PIMOZIDE	ENSG00000112033.13	PPARD	Fall	6	0
GOSERELIN	ENSG00000147437.9	GNRH1	Spring	8	0
EFLORNITHINE	ENSG00000115758.12	ODC1	Spring	0	9
METFORMIN HYDROCHLORIDE	ENSG00000123545.5	NDUFAF4	Fall	0	10
PF-00562271	ENSG00000130669.17	PAK4	Fall	6	0
CAPECITABINE	ENSG00000073756.11	PTGS2	Summer	7	0
SAGOPILONE	ENSG00000137285.9	TUBB2B	Fall	8	0
MITOXANTRONE HYDROCHLORIDE	ENSG00000112033.13	PPARD	Fall	6	0
ARCAINE	ENSG00000213199.7	ASIC3	Fall	6	0
GEDATOLISIB	ENSG00000146648.17	EGFR	Summer	0	6
HALOPERIDOL	ENSG00000100197.20	CYP2D6	Fall	6	0
AGMATINE	ENSG00000213199.7	ASIC3	Fall	6	0
CHEMBL599924	ENSG00000166851.14	PLK1	Fall	9	0
CHEMBL546797	ENSG00000148053.15	NTRK2	Summer	6	1
FLURBIPROFEN	ENSG00000073756.11	PTGS2	Summer	7	0
CAPIVASERTIB	ENSG00000105221.16	AKT2	Fall	9	0
LITHIUM	ENSG00000147437.9	GNRH1	Spring	8	0
MLN-8054	ENSG00000142627.12	EPHA2	Winter	0	8
GOSSYPOL	ENSG00000170606.14	HSPA4	Summer	6	0
CHEMBL83954	ENSG00000100197.20	CYP2D6	Fall	6	0
FOMEPIZOLE	ENSG00000196616.13	ADH1B	Summer	0	8
MAB-425	ENSG00000146648.17	EGFR	Summer	0	6
CHEMBL534535	ENSG00000166851.14	PLK1	Fall	9	0
BENZAMIL	ENSG00000100197.20	CYP2D6	Fall	6	0
TG100-801	ENSG00000102755.11	FLT1	Winter	1	8
EMODIC ACID	ENSG00000185513.14	L3MBTL1	Fall	6	0
EMODIC ACID	ENSG00000185513.14	L3MBTL1	Summer	0	6
SAPROPTERIN	ENSG00000164867.10	NOS3	Fall	8	2
SAPROPTERIN	ENSG00000164867.10	NOS3	Winter	0	9
BENZETHONIUM	ENSG00000100197.20	CYP2D6	Fall	6	0
CHEMBL1288013	ENSG00000100197.20	CYP2D6	Fall	6	0
ME-344	ENSG00000164258.11	NDUFS4	Fall	0	12
ME-344	ENSG00000164258.11	NDUFS4	Spring	6	0
CEFSULODIN SODIUM	ENSG00000166851.14	PLK1	Fall	9	0
ACETAMINOPHEN	ENSG00000196689.11	TRPV1	Fall	10	0
IMATINIB	ENSG00000186716.20	BCR	Spring	0	6
HYCANTHONE	ENSG00000101751.10	POLI	Summer	0	6
CARPROFEN	ENSG00000073756.11	PTGS2	Summer	7	0
PURPURIN	ENSG00000108773.10	KAT2A	Summer	0	6
OXYMETAZOLINE	ENSG00000100197.20	CYP2D6	Fall	6	0
GENTAMICIN	ENSG00000100031.18	GGT1	Summer	0	6
CHEMBL1288281	ENSG00000124588.19	NQO2	Fall	0	9
CHEMBL1288281	ENSG00000124588.19	NQO2	Spring	8	0
ATENOLOL	ENSG00000111664.10	GNB3	Summer	6	0
ATENOLOL	ENSG00000111664.10	GNB3	Winter	0	7
BORTEZOMIB	ENSG00000115233.11	PSMD14	Fall	0	7
SELUMETINIB	ENSG00000118046.14	STK11	Fall	6	0
ALPRAZOLAM	ENSG00000141867.17	BRD4	Fall	9	0
ALPRAZOLAM	ENSG00000141867.17	BRD4	Spring	0	7
ALPRAZOLAM	ENSG00000141867.17	BRD4	Winter	0	6
QUERCETIN	ENSG00000051382.8	PIK3CB	Fall	0	9
GANTENERUMAB	ENSG00000142192.20	APP	Summer	7	0
U-50488 METHANE SULFONATE	ENSG00000100197.20	CYP2D6	Fall	6	0
PF-00562271	ENSG00000102755.11	FLT1	Winter	1	8
SELUMETINIB	ENSG00000034152.18	MAP2K3	Fall	7	3
SELUMETINIB	ENSG00000034152.18	MAP2K3	Winter	1	11
HYDROCOTARNINE	ENSG00000100197.20	CYP2D6	Fall	6	0
NAFAMOSTAT	ENSG00000204983.13	PRSS1	Spring	9	0
DESLORATADINE	ENSG00000112033.13	PPARD	Fall	6	0
PALONOSETRON	ENSG00000100197.20	CYP2D6	Fall	6	0
CRENIGACESTAT	ENSG00000148400.9	NOTCH1	Fall	8	2
PRACINOSTAT	ENSG00000100429.17	HDAC10	Fall	10	0
CARMINE	ENSG00000101751.10	POLI	Summer	0	6
PHENOXYBENZAMINE HYDROCHLORIDE	ENSG00000100644.16	HIF1A	Fall	6	0
PHENOXYBENZAMINE HYDROCHLORIDE	ENSG00000100644.16	HIF1A	Spring	1	8
CHEMBL1814509	ENSG00000185513.14	L3MBTL1	Fall	6	0
CHEMBL1814509	ENSG00000185513.14	L3MBTL1	Summer	0	6
THEOPHYLLINE SODIUM GLYCINATE	ENSG00000065989.15	PDE4A	Spring	6	0
OLEIC ACID	ENSG00000108773.10	KAT2A	Summer	0	6
PINAFIDE	ENSG00000170989.8	S1PR1	Fall	8	1
PINAFIDE	ENSG00000170989.8	S1PR1	Spring	0	6
ETOPOSIDE	ENSG00000151247.12	EIF4E	Fall	0	7
MIANSERIN	ENSG00000044574.7	HSPA5	Summer	7	0
THIORIDAZINE	ENSG00000100197.20	CYP2D6	Fall	6	0
OXYPHENBUTAZONE	ENSG00000163631.16	ALB	Fall	0	8
OXYPHENBUTAZONE	ENSG00000163631.16	ALB	Summer	10	0
CUDC-101	ENSG00000146648.17	EGFR	Summer	0	6
CHLORTHALIDONE	ENSG00000135744.7	AGT	Fall	7	0
CHEMBL285063	ENSG00000146648.17	EGFR	Summer	0	6
CELECOXIB	ENSG00000073756.11	PTGS2	Summer	7	0
PNU-99194A	ENSG00000100197.20	CYP2D6	Fall	6	0
PENTABROMOPHENOL	ENSG00000166851.14	PLK1	Fall	9	0
TYRPHOSTIN 51	ENSG00000101751.10	POLI	Summer	0	6
RALOXIFENE HYDROCHLORIDE	ENSG00000161800.12	RACGAP1	Spring	8	1
TESIDOLUMAB	ENSG00000106804.7	C5	Summer	0	8
CHEMBL1951415	ENSG00000213923.11	CSNK1E	Fall	8	0
BETRIXABAN	ENSG00000126218.11	F10	Summer	6	0
CHEMBL1256813	ENSG00000108773.10	KAT2A	Summer	0	6
ENDO-ATROPINE	ENSG00000100197.20	CYP2D6	Fall	6	0
GSK-461364	ENSG00000166851.14	PLK1	Fall	9	0
OCTREOTIDE	ENSG00000051382.8	PIK3CB	Fall	0	9
CEFIXIME	ENSG00000101751.10	POLI	Summer	0	6
MAVELERTINIB	ENSG00000146648.17	EGFR	Summer	0	6
ENMD-2076	ENSG00000102755.11	FLT1	Winter	1	8
DICLOFENAC SODIUM	ENSG00000100644.16	HIF1A	Fall	6	0
DICLOFENAC SODIUM	ENSG00000100644.16	HIF1A	Spring	1	8
CHEMBL401565	ENSG00000100906.10	NFKBIA	Winter	1	6
PHENYLBUTAZONE	ENSG00000100197.20	CYP2D6	Fall	6	0
CHEMBL602807	ENSG00000166851.14	PLK1	Fall	9	0
ACITRETIN	ENSG00000166851.14	PLK1	Fall	9	0
BORTEZOMIB	ENSG00000170276.5	HSPB2	Winter	0	8
VERUBULIN	ENSG00000137285.9	TUBB2B	Fall	8	0
LOVASTATIN	ENSG00000130164.13	LDLR	Fall	10	0
LOVASTATIN	ENSG00000130164.13	LDLR	Winter	1	7
MIVEBRESIB	ENSG00000141867.17	BRD4	Fall	9	0
MIVEBRESIB	ENSG00000141867.17	BRD4	Spring	0	7
MIVEBRESIB	ENSG00000141867.17	BRD4	Winter	0	6
GEFITINIB	ENSG00000100197.20	CYP2D6	Fall	6	0
CHEMBL177126	ENSG00000142192.20	APP	Summer	7	0
CAMOSTAT	ENSG00000204983.13	PRSS1	Spring	9	0
ENTINOSTAT	ENSG00000061273.17	HDAC7	Fall	12	0
CYCLOBENZAPRINE	ENSG00000100197.20	CYP2D6	Fall	6	0
3',4'-DIMETHOXYFLAVONE	ENSG00000108773.10	KAT2A	Summer	0	6
BACLOFEN	ENSG00000170345.9	FOS	Winter	0	6
CEVIMELINE	ENSG00000100197.20	CYP2D6	Fall	6	0
CHEMBL119878	ENSG00000101751.10	POLI	Summer	0	6
SALICYLHYDROXAMIC ACID	ENSG00000100644.16	HIF1A	Fall	6	0
SALICYLHYDROXAMIC ACID	ENSG00000100644.16	HIF1A	Spring	1	8
DICARBONODITHIOIMIDIC DIAMIDE	ENSG00000106211.8	HSPB1	Fall	10	0
DICARBONODITHIOIMIDIC DIAMIDE	ENSG00000106211.8	HSPB1	Winter	0	13
CHEMBL592314	ENSG00000166851.14	PLK1	Fall	9	0
TEGASEROD MALEATE	ENSG00000002016.17	RAD52	Fall	6	0
CHEMBL421431	ENSG00000166851.14	PLK1	Fall	9	0
MIDOSTAURIN	ENSG00000051382.8	PIK3CB	Fall	0	9
GUANOSINE	ENSG00000198805.11	PNP	Winter	0	7
BUDESONIDE	ENSG00000100197.20	CYP2D6	Fall	6	0
AT-406	ENSG00000101966.12	XIAP	Spring	0	6
BECLOMETHASONE	ENSG00000100197.20	CYP2D6	Fall	6	0
NGD-8243	ENSG00000196689.11	TRPV1	Fall	10	0
CHEMBL56543	ENSG00000044574.7	HSPA5	Summer	7	0
CELASTROL	ENSG00000096384.19	HSP90AB1	Summer	6	0
ALCOHOL	ENSG00000186111.9	PIP5K1C	Spring	0	6
CHEMBL472004	ENSG00000148926.9	ADM	Winter	0	12
CYCLOSTREPTIN	ENSG00000176014.12	TUBB6	Winter	3	8
ROFLUMILAST	ENSG00000065989.15	PDE4A	Spring	6	0
RG-7160	ENSG00000146648.17	EGFR	Summer	0	6
CHEMBL429095	ENSG00000166851.14	PLK1	Fall	9	0
TACROLIMUS	ENSG00000148737.16	TCF7L2	Fall	6	0
LEXIBULIN	ENSG00000176014.12	TUBB6	Winter	3	8
SODIUM CHLORIDE	ENSG00000160255.17	ITGB2	Summer	0	7
DORAMAPIMOD	ENSG00000148053.15	NTRK2	Summer	6	1
TACROLIMUS	ENSG00000100197.20	CYP2D6	Fall	6	0
CHEMBL1984884	ENSG00000185513.14	L3MBTL1	Fall	6	0
CHEMBL1984884	ENSG00000185513.14	L3MBTL1	Summer	0	6
HYDROQUINONE	ENSG00000100644.16	HIF1A	Fall	6	0
HYDROQUINONE	ENSG00000100644.16	HIF1A	Spring	1	8
DEXAMETHASONE	ENSG00000100031.18	GGT1	Summer	0	6
OLVANIL	ENSG00000100197.20	CYP2D6	Fall	6	0
MESALAMINE	ENSG00000073756.11	PTGS2	Summer	7	0
DICLOFENAC SODIUM	ENSG00000073756.11	PTGS2	Summer	7	0
CHEMBL260311	ENSG00000185513.14	L3MBTL1	Fall	6	0
CHEMBL260311	ENSG00000185513.14	L3MBTL1	Summer	0	6
LY-2780301	ENSG00000105221.16	AKT2	Fall	9	0
VEMURAFENIB	ENSG00000146648.17	EGFR	Summer	0	6
CORYNANTHEINE	ENSG00000100197.20	CYP2D6	Fall	6	0
BENZYL SALICYLATE	ENSG00000042088.13	TDP1	Winter	7	0
ULODESINE	ENSG00000198805.11	PNP	Winter	0	7
CHEMBL335538	ENSG00000244165.1	P2RY11	Fall	9	0
SILDENAFIL	ENSG00000111664.10	GNB3	Summer	6	0
SILDENAFIL	ENSG00000111664.10	GNB3	Winter	0	7
CHLORQUINALDOL	ENSG00000044574.7	HSPA5	Summer	7	0
BENZENETHIOL	ENSG00000106211.8	HSPB1	Fall	10	0
BENZENETHIOL	ENSG00000106211.8	HSPB1	Winter	0	13
CHLORPROMAZINE HYDROCHLORIDE	ENSG00000112033.13	PPARD	Fall	6	0
SP-600125	ENSG00000091436.16	MAP3K20	Spring	0	6
KAINIC ACID	ENSG00000108773.10	KAT2A	Summer	0	6
S-222611	ENSG00000146648.17	EGFR	Summer	0	6
NORDIHYDROGUAIARETIC ACID	ENSG00000096384.19	HSP90AB1	Summer	6	0
AMPICILLIN TRIHYDRATE	ENSG00000042088.13	TDP1	Winter	7	0
IBUDILAST	ENSG00000184588.17	PDE4B	Summer	6	0
SOTALOL	ENSG00000100197.20	CYP2D6	Fall	6	0
NIACIN	ENSG00000100197.20	CYP2D6	Fall	6	0
CHEMBL1997335	ENSG00000102755.11	FLT1	Winter	1	8
LAPATINIB	ENSG00000103319.11	EEF2K	Fall	8	0
ROMIDEPSIN	ENSG00000048052.21	HDAC9	Fall	0	6
EMODIN	ENSG00000100197.20	CYP2D6	Fall	6	0
HARMOL	ENSG00000161800.12	RACGAP1	Spring	8	1
CISPLATIN	ENSG00000175197.11	DDIT3	Winter	0	6
METHADONE	ENSG00000093010.13	COMT	Fall	7	0
INDOMETHACIN	ENSG00000203747.10	FCGR3A	Fall	6	1
AZD-3759	ENSG00000146648.17	EGFR	Summer	0	6
CHEMBL336292	ENSG00000244165.1	P2RY11	Fall	9	0
ERLOTINIB	ENSG00000099875.14	MKNK2	Fall	8	0
ERLOTINIB	ENSG00000099875.14	MKNK2	Winter	1	7
NITROFURANTOIN	ENSG00000100197.20	CYP2D6	Fall	6	0
SELUMETINIB	ENSG00000079432.7	CIC	Fall	7	0
IDRONOXIL	ENSG00000101966.12	XIAP	Spring	0	6
DOXEPIN	ENSG00000100197.20	CYP2D6	Fall	6	0
CARFILZOMIB	ENSG00000106588.10	PSMA2	Fall	0	7
CHEMBL387152	ENSG00000042088.13	TDP1	Winter	7	0
OXYCODONE	ENSG00000093010.13	COMT	Fall	7	0
REMOXIPRIDE	ENSG00000100197.20	CYP2D6	Fall	6	0
TANESPIMYCIN	ENSG00000096384.19	HSP90AB1	Summer	6	0
CHEMBL592558	ENSG00000002016.17	RAD52	Fall	6	0
TEPOXALIN	ENSG00000012779.10	ALOX5	Summer	0	8
DIPYRIDAMOLE	ENSG00000166851.14	PLK1	Fall	9	0
CHEMBL1329326	ENSG00000100197.20	CYP2D6	Fall	6	0
FLAVOXATE HYDROCHLORIDE	ENSG00000184588.17	PDE4B	Summer	6	0
STAUROSPORINE	ENSG00000175197.11	DDIT3	Winter	0	6
MIDAZOLAM	ENSG00000127948.15	POR	Fall	9	0
MIDAZOLAM	ENSG00000127948.15	POR	Spring	0	8
PROPYLPYRAZOLETRIOL	ENSG00000100197.20	CYP2D6	Fall	6	0
SB-202190	ENSG00000178950.16	GAK	Fall	7	0
MILRINONE	ENSG00000065989.15	PDE4A	Spring	6	0
SIMVASTATIN	ENSG00000178726.6	THBD	Fall	9	1
SIMVASTATIN	ENSG00000178726.6	THBD	Winter	0	9
VOXTALISIB	ENSG00000051382.8	PIK3CB	Fall	0	9
LINIFANIB	ENSG00000102755.11	FLT1	Winter	1	8
CETIRIZINE	ENSG00000095917.13	TPSD1	Fall	6	0
DAPOXETINE	ENSG00000100197.20	CYP2D6	Fall	6	0
PONEZUMAB	ENSG00000142192.20	APP	Summer	7	0
CHEMBL177809	ENSG00000100197.20	CYP2D6	Fall	6	0
FRUQUINTINIB	ENSG00000102755.11	FLT1	Winter	1	8
ISOPROTERENOL	ENSG00000100644.16	HIF1A	Fall	6	0
ISOPROTERENOL	ENSG00000100644.16	HIF1A	Spring	1	8
CHEMBL1310701	ENSG00000166851.14	PLK1	Fall	9	0
TELENZEPINE	ENSG00000100197.20	CYP2D6	Fall	6	0
OZANIMOD	ENSG00000170989.8	S1PR1	Fall	8	1
OZANIMOD	ENSG00000170989.8	S1PR1	Spring	0	6
PROTOPORPHYRIN	ENSG00000166851.14	PLK1	Fall	9	0
ATAZANAVIR	ENSG00000184985.16	SORCS2	Summer	5	7
ILORASERTIB	ENSG00000061938.16	TNK2	Fall	6	0
FOSBRETABULIN DISODIUM	ENSG00000137285.9	TUBB2B	Fall	8	0
KETOROLAC	ENSG00000073756.11	PTGS2	Summer	7	0
ATORVASTATIN	ENSG00000112033.13	PPARD	Fall	6	0
LOMOFUNGIN	ENSG00000166851.14	PLK1	Fall	9	0
CEPHALOCHROMIN	ENSG00000162551.13	ALPL	Fall	6	0
PIROXICAM	ENSG00000188257.10	PLA2G2A	Fall	7	0
OSI-632	ENSG00000142627.12	EPHA2	Winter	0	8
METHIONINE	ENSG00000124713.5	GNMT	Summer	0	12
CHEMBL124006	ENSG00000002016.17	RAD52	Fall	6	0
AZD-1152-HQPA	ENSG00000146648.17	EGFR	Summer	0	6
MEFENAMIC ACID	ENSG00000100197.20	CYP2D6	Fall	6	0
CHEMBL1232076	ENSG00000166851.14	PLK1	Fall	9	0
PREGABALIN	ENSG00000182389.19	CACNB4	Winter	6	0
MOCETINOSTAT	ENSG00000061273.17	HDAC7	Fall	12	0
QUERCETIN	ENSG00000077150.18	NFKB2	Fall	11	0
QUERCETIN	ENSG00000077150.18	NFKB2	Winter	0	6
DULOXETINE	ENSG00000100197.20	CYP2D6	Fall	6	0
CHEMBL495852	ENSG00000166851.14	PLK1	Fall	9	0
ME-344	ENSG00000119013.8	NDUFB3	Fall	1	8
ROLIPRAM	ENSG00000065989.15	PDE4A	Spring	6	0
ORYZALIN	ENSG00000112033.13	PPARD	Fall	6	0
MITOXANTRONE HYDROCHLORIDE	ENSG00000185513.14	L3MBTL1	Fall	6	0
MITOXANTRONE HYDROCHLORIDE	ENSG00000185513.14	L3MBTL1	Summer	0	6
CHEMBL1339015	ENSG00000100197.20	CYP2D6	Fall	6	0
CURCUMIN	ENSG00000169598.15	DFFB	Winter	6	0
CHEMBL515505	ENSG00000101751.10	POLI	Summer	0	6
DOXORUBICIN	ENSG00000198959.11	TGM2	Fall	7	0
DOXORUBICIN	ENSG00000198959.11	TGM2	Spring	0	6
ACACETIN	ENSG00000077150.18	NFKB2	Fall	11	0
ACACETIN	ENSG00000077150.18	NFKB2	Winter	0	6
VINBLASTINE	ENSG00000176014.12	TUBB6	Winter	3	8
BREXPIPRAZOLE	ENSG00000100197.20	CYP2D6	Fall	6	0
INDINAVIR	ENSG00000100197.20	CYP2D6	Fall	6	0
CHEMBL225519	ENSG00000188130.13	MAPK12	Fall	6	0
CHEMBL225519	ENSG00000188130.13	MAPK12	Summer	0	6
BIMIRALISIB	ENSG00000051382.8	PIK3CB	Fall	0	9
DEXTROMETHORPHAN	ENSG00000100197.20	CYP2D6	Fall	6	0
NIMESULIDE	ENSG00000170606.14	HSPA4	Summer	6	0
CETUXIMAB	ENSG00000146648.17	EGFR	Summer	0	6
SAFINAMIDE	ENSG00000182389.19	CACNB4	Winter	6	0
(R,S)-INDATRALINE	ENSG00000090534.17	THPO	Fall	6	0
DIDANOSINE	ENSG00000100197.20	CYP2D6	Fall	6	0
PHENOBARBITAL	ENSG00000100197.20	CYP2D6	Fall	6	0
GARLIC	ENSG00000100197.20	CYP2D6	Fall	6	0
NORDIHYDROGUAIARETIC ACID	ENSG00000101751.10	POLI	Summer	0	6
CLOZAPINE	ENSG00000130522.5	JUND	Winter	1	15
ENTINOSTAT	ENSG00000100429.17	HDAC10	Fall	10	0
ENTRECTINIB	ENSG00000148053.15	NTRK2	Summer	6	1
TICLOPIDINE	ENSG00000179344.16	HLA-DQB1	Fall	0	8
TICLOPIDINE	ENSG00000179344.16	HLA-DQB1	Summer	6	0
RALTITREXED	ENSG00000173638.18	SLC19A1	Fall	6	0
CHEMBL2022241	ENSG00000096384.19	HSP90AB1	Summer	6	0
NOREPINEPHRINE	ENSG00000042088.13	TDP1	Winter	7	0
CUCURBITACIN B	ENSG00000168610.14	STAT3	Spring	0	6
MK-2461	ENSG00000148053.15	NTRK2	Summer	6	1
CHEMBL565711	ENSG00000074416.13	MGLL	Fall	2	8
MOCETINOSTAT	ENSG00000100429.17	HDAC10	Fall	10	0
ZAMPANOLIDE	ENSG00000137285.9	TUBB2B	Fall	8	0
AMSACRINE	ENSG00000100197.20	CYP2D6	Fall	6	0
SCYLLITOL	ENSG00000142192.20	APP	Summer	7	0
GIVINOSTAT	ENSG00000100429.17	HDAC10	Fall	10	0
VORINOSTAT	ENSG00000100429.17	HDAC10	Fall	10	0
CBS-9106	ENSG00000082898.16	XPO1	Spring	0	6
RIBAVIRIN	ENSG00000073060.15	SCARB1	Fall	6	0
ABEXINOSTAT	ENSG00000100429.17	HDAC10	Fall	10	0
RETINOL	ENSG00000130164.13	LDLR	Fall	10	0
RETINOL	ENSG00000130164.13	LDLR	Winter	1	7
CHEMBL317115	ENSG00000185513.14	L3MBTL1	Fall	6	0
CHEMBL317115	ENSG00000185513.14	L3MBTL1	Summer	0	6
FORODESINE	ENSG00000198805.11	PNP	Winter	0	7
N6-PHENYLADENOSINE	ENSG00000164128.6	NPY1R	Fall	0	7
BRONTICTUZUMAB	ENSG00000148400.9	NOTCH1	Fall	8	2
INDOMETHACIN	ENSG00000100197.20	CYP2D6	Fall	6	0
BAN2401	ENSG00000142192.20	APP	Summer	7	0
APREMILAST	ENSG00000065989.15	PDE4A	Spring	6	0
MOLIBRESIB	ENSG00000141867.17	BRD4	Fall	9	0
MOLIBRESIB	ENSG00000141867.17	BRD4	Spring	0	7
MOLIBRESIB	ENSG00000141867.17	BRD4	Winter	0	6
OXIDOPAMINE HYDROCHLORIDE	ENSG00000042088.13	TDP1	Winter	7	0
SUBEROHYDROXAMIC ACID	ENSG00000048052.21	HDAC9	Fall	0	6
DIFLUNISAL	ENSG00000073756.11	PTGS2	Summer	7	0
CHEMBL483838	ENSG00000101751.10	POLI	Summer	0	6
CHLOROETHYLCLONIDINE	ENSG00000100644.16	HIF1A	Fall	6	0
CHLOROETHYLCLONIDINE	ENSG00000100644.16	HIF1A	Spring	1	8
CHEMBL19954	ENSG00000161800.12	RACGAP1	Spring	8	1
TEROXIRONE	ENSG00000106211.8	HSPB1	Fall	10	0
TEROXIRONE	ENSG00000106211.8	HSPB1	Winter	0	13
PREDNISOLONE	ENSG00000242252.1	BGLAP	Fall	7	0
PREDNISOLONE	ENSG00000242252.1	BGLAP	Winter	0	7
GEFITINIB	ENSG00000198355.4	PIM3	Fall	7	0
GEFITINIB	ENSG00000198355.4	PIM3	Winter	1	9
DEXTROMETHORPHAN HYDROBROMIDE	ENSG00000100197.20	CYP2D6	Fall	6	0
CIMETIDINE	ENSG00000100197.20	CYP2D6	Fall	6	0
PYROGALLOL RED	ENSG00000185513.14	L3MBTL1	Fall	6	0
PYROGALLOL RED	ENSG00000185513.14	L3MBTL1	Summer	0	6
SOLANEZUMAB	ENSG00000142192.20	APP	Summer	7	0
CUSTIRSEN SODIUM	ENSG00000120885.21	CLU	Fall	7	0
CUSTIRSEN SODIUM	ENSG00000120885.21	CLU	Spring	0	8
CHEMBL1271162	ENSG00000126218.11	F10	Summer	6	0
UREA	ENSG00000090534.17	THPO	Fall	6	0
NADIDE	ENSG00000244165.1	P2RY11	Fall	9	0
HYDROCORTISONE	ENSG00000135744.7	AGT	Fall	7	0
ALDESLEUKIN	ENSG00000051382.8	PIK3CB	Fall	0	9
MLNM-2201	ENSG00000160255.17	ITGB2	Summer	0	7
ETORICOXIB	ENSG00000073756.11	PTGS2	Summer	7	0
TAZAROTENE	ENSG00000077092.18	RARB	Fall	0	6
ADAVOSERTIB	ENSG00000061938.16	TNK2	Fall	6	0
CHEMBL1368696	ENSG00000142192.20	APP	Summer	7	0
CHEMBL2095095	ENSG00000011304.19	PTBP1	Fall	6	1
LICOFELONE	ENSG00000073756.11	PTGS2	Summer	7	0
CHEMBL2095095	ENSG00000100219.16	XBP1	Summer	7	0
GOSSYPETIN	ENSG00000077150.18	NFKB2	Fall	11	0
GOSSYPETIN	ENSG00000077150.18	NFKB2	Winter	0	6
RG-1530	ENSG00000102755.11	FLT1	Winter	1	8
CHEMBL548629	ENSG00000166851.14	PLK1	Fall	9	0
CEP-11981	ENSG00000102755.11	FLT1	Winter	1	8
CHEMBL553503	ENSG00000101751.10	POLI	Summer	0	6
CARBAMAZEPINE	ENSG00000179344.16	HLA-DQB1	Fall	0	8
CARBAMAZEPINE	ENSG00000179344.16	HLA-DQB1	Summer	6	0
QUINACRINE DIHYDROCHLORIDE	ENSG00000101751.10	POLI	Summer	0	6
BENZYL ISOTHIOCYANATE	ENSG00000196689.11	TRPV1	Fall	10	0
CHEMBL591613	ENSG00000100197.20	CYP2D6	Fall	6	0
GSK-690693	ENSG00000142875.19	PRKACB	Fall	2	7
ZALCITABINE	ENSG00000147437.9	GNRH1	Spring	8	0
JNJ-7706621	ENSG00000102755.11	FLT1	Winter	1	8
CHEMBL1489812	ENSG00000166851.14	PLK1	Fall	9	0
MK-2206	ENSG00000105221.16	AKT2	Fall	9	0
DIPHENHYDRAMINE	ENSG00000100197.20	CYP2D6	Fall	6	0
EPIGALOCATECHIN GALLATE	ENSG00000163631.16	ALB	Fall	0	8
EPIGALOCATECHIN GALLATE	ENSG00000163631.16	ALB	Summer	10	0
LOVASTATIN	ENSG00000051382.8	PIK3CB	Fall	0	9
PYROGALLOL RED	ENSG00000101751.10	POLI	Summer	0	6
NV-128	ENSG00000119013.8	NDUFB3	Fall	1	8
CHEMBL1836411	ENSG00000137462.6	TLR2	Summer	0	13
CHLORPYRIFOS	ENSG00000042088.13	TDP1	Winter	7	0
VERUBULIN	ENSG00000176014.12	TUBB6	Winter	3	8
ARTESUNATE	ENSG00000077150.18	NFKB2	Fall	11	0
ARTESUNATE	ENSG00000077150.18	NFKB2	Winter	0	6
ISOFLUROPHATE	ENSG00000114200.9	BCHE	Summer	8	2
ETICLOPRIDE	ENSG00000100644.16	HIF1A	Fall	6	0
ETICLOPRIDE	ENSG00000100644.16	HIF1A	Spring	1	8
CILOSTAZOL	ENSG00000178726.6	THBD	Fall	9	1
CILOSTAZOL	ENSG00000178726.6	THBD	Winter	0	9
INOTERSEN	ENSG00000118271.9	TTR	Spring	7	0
CHEMBL478754	ENSG00000002016.17	RAD52	Fall	6	0
CYANOPEPTOLIN S	ENSG00000275896.5	PRSS2	Spring	9	0
CYANOPEPTOLIN S	ENSG00000275896.5	PRSS2	Winter	0	6
LOFEXIDINE	ENSG00000100197.20	CYP2D6	Fall	6	0
CHEMBL68534	ENSG00000101751.10	POLI	Summer	0	6
GABAPENTIN ENACARBIL	ENSG00000182389.19	CACNB4	Winter	6	0
ESTRAMUSTINE	ENSG00000108773.10	KAT2A	Summer	0	6
CHLORPROMAZINE HYDROCHLORIDE	ENSG00000002016.17	RAD52	Fall	6	0
GUANIDINONALTRINDOLE	ENSG00000108773.10	KAT2A	Summer	0	6
CHEMBL592124	ENSG00000108773.10	KAT2A	Summer	0	6
BI-2536	ENSG00000166851.14	PLK1	Fall	9	0
CHEMBL535714	ENSG00000184588.17	PDE4B	Summer	6	0
FIMEPINOSTAT	ENSG00000061273.17	HDAC7	Fall	12	0
CHEMBL590665	ENSG00000166851.14	PLK1	Fall	9	0
BORTEZOMIB	ENSG00000100804.18	PSMB5	Fall	0	6
BUTANOIC ACID	ENSG00000100429.17	HDAC10	Fall	10	0
ROLIPRAM	ENSG00000184588.17	PDE4B	Summer	6	0
CHEMBL598608	ENSG00000112033.13	PPARD	Fall	6	0
ERGOCRYPTINE	ENSG00000101751.10	POLI	Summer	0	6
FAMITINIB	ENSG00000102755.11	FLT1	Winter	1	8
DONEPEZIL	ENSG00000100197.20	CYP2D6	Fall	6	0
CHEMBL582764	ENSG00000166851.14	PLK1	Fall	9	0
CLOFAZIMINE	ENSG00000100197.20	CYP2D6	Fall	6	0
ABT-751	ENSG00000137285.9	TUBB2B	Fall	8	0
BIRINAPANT	ENSG00000101966.12	XIAP	Spring	0	6
CHEMBL1256660	ENSG00000002016.17	RAD52	Fall	6	0
SNS-314	ENSG00000099875.14	MKNK2	Fall	8	0
SNS-314	ENSG00000099875.14	MKNK2	Winter	1	7
SENNOSIDE B	ENSG00000185513.14	L3MBTL1	Fall	6	0
SENNOSIDE B	ENSG00000185513.14	L3MBTL1	Summer	0	6
METHADONE	ENSG00000111664.10	GNB3	Summer	6	0
METHADONE	ENSG00000111664.10	GNB3	Winter	0	7
EMACTUZUMAB	ENSG00000184371.13	CSF1	Fall	7	1
TENOXICAM	ENSG00000073756.11	PTGS2	Summer	7	0
COMBRETASTATIN A4	ENSG00000137285.9	TUBB2B	Fall	8	0
CHEMBL1871992	ENSG00000166851.14	PLK1	Fall	9	0
GENISTEIN	ENSG00000090534.17	THPO	Fall	6	0
SORAFENIB	ENSG00000117713.18	ARID1A	Fall	10	0
SORAFENIB	ENSG00000117713.18	ARID1A	Spring	0	6
LEUCOVORIN	ENSG00000173638.18	SLC19A1	Fall	6	0
CHEMBL604321	ENSG00000011304.19	PTBP1	Fall	6	1
BENZBROMARONE	ENSG00000100644.16	HIF1A	Fall	6	0
BENZBROMARONE	ENSG00000100644.16	HIF1A	Spring	1	8
CHLOROPYRAMINE	ENSG00000100197.20	CYP2D6	Fall	6	0
METHIONINE	ENSG00000146733.13	PSPH	Fall	7	0
TAMOXIFEN	ENSG00000078401.6	EDN1	Summer	0	6
TAMOXIFEN	ENSG00000078401.6	EDN1	Winter	6	0
PSAMMAPLIN A	ENSG00000100429.17	HDAC10	Fall	10	0
CYCLOPHOSPHAMIDE	ENSG00000116761.11	CTH	Fall	7	0
ATRELEUTON	ENSG00000012779.10	ALOX5	Summer	0	8
LINOLENIC ACID	ENSG00000042088.13	TDP1	Winter	7	0
CHEMBL1453126	ENSG00000101751.10	POLI	Summer	0	6
VINCRISTINE SULFATE	ENSG00000100644.16	HIF1A	Fall	6	0
VINCRISTINE SULFATE	ENSG00000100644.16	HIF1A	Spring	1	8
INFIGRATINIB	ENSG00000051382.8	PIK3CB	Fall	0	9
KETANSERIN	ENSG00000170606.14	HSPA4	Summer	6	0
CYCLOSPORINE	ENSG00000127948.15	POR	Fall	9	0
CYCLOSPORINE	ENSG00000127948.15	POR	Spring	0	8
CHEMBL1271059	ENSG00000166851.14	PLK1	Fall	9	0
PROTOAPIGENONE	ENSG00000100219.16	XBP1	Summer	7	0
NORDIHYDROGUAIARETIC ACID	ENSG00000100197.20	CYP2D6	Fall	6	0
RESVERATROL	ENSG00000242252.1	BGLAP	Fall	7	0
RESVERATROL	ENSG00000242252.1	BGLAP	Winter	0	7
METHOTREXATE	ENSG00000170276.5	HSPB2	Winter	0	8
GARCINONE E	ENSG00000100219.16	XBP1	Summer	7	0
MAPROTILINE HYDROCHLORIDE	ENSG00000100197.20	CYP2D6	Fall	6	0
CHEMBL515505	ENSG00000166851.14	PLK1	Fall	9	0
CHEMBL333177	ENSG00000112033.13	PPARD	Fall	6	0
SULINDAC	ENSG00000100197.20	CYP2D6	Fall	6	0
GANETESPIB	ENSG00000096384.19	HSP90AB1	Summer	6	0
CHEMBL328540	ENSG00000161800.12	RACGAP1	Spring	8	1
1D09C3	ENSG00000198502.5	HLA-DRB5	Spring	0	13
1D09C3	ENSG00000198502.5	HLA-DRB5	Summer	10	0
QUINPIROLE	ENSG00000042088.13	TDP1	Winter	7	0
IRETOL	ENSG00000042088.13	TDP1	Winter	7	0
CHEMBL1765740	ENSG00000146648.17	EGFR	Summer	0	6
NICOTINE	ENSG00000123358.19	NR4A1	Winter	0	12
PHENYTOIN	ENSG00000100197.20	CYP2D6	Fall	6	0
IXABEPILONE	ENSG00000176014.12	TUBB6	Winter	3	8
VORINOSTAT	ENSG00000048052.21	HDAC9	Fall	0	6
PACLITAXEL	ENSG00000137285.9	TUBB2B	Fall	8	0
TACRINE	ENSG00000100197.20	CYP2D6	Fall	6	0
AZD-1152-HQPA	ENSG00000102755.11	FLT1	Winter	1	8
PF-00477736	ENSG00000146648.17	EGFR	Summer	0	6
SB-220025	ENSG00000176444.18	CLK2	Fall	6	0
CHEMBL81782	ENSG00000185513.14	L3MBTL1	Fall	6	0
CHEMBL81782	ENSG00000185513.14	L3MBTL1	Summer	0	6
VERNAKALANT	ENSG00000100197.20	CYP2D6	Fall	6	0
GIVINOSTAT	ENSG00000048052.21	HDAC9	Fall	0	6
LORNOXICAM	ENSG00000101751.10	POLI	Summer	0	6
OLEIC ACID	ENSG00000166851.14	PLK1	Fall	9	0
CHEMBL68096	ENSG00000002016.17	RAD52	Fall	6	0
PRASTERONE	ENSG00000051382.8	PIK3CB	Fall	0	9
LEVAMISOLE	ENSG00000162551.13	ALPL	Fall	6	0
SULFASALAZINE	ENSG00000073756.11	PTGS2	Summer	7	0
MORPHINE	ENSG00000100197.20	CYP2D6	Fall	6	0
CHEMBL68096	ENSG00000116030.16	SUMO1	Fall	0	7
PAPAVERINE	ENSG00000090534.17	THPO	Fall	6	0
PAZOPANIB	ENSG00000112033.13	PPARD	Fall	6	0
PANOBINOSTAT	ENSG00000100429.17	HDAC10	Fall	10	0
ISOTRETINOIN	ENSG00000131759.17	RARA	Winter	0	7
BAZEDOXIFENE ACETATE	ENSG00000112033.13	PPARD	Fall	6	0
CHEMBL1605629	ENSG00000166851.14	PLK1	Fall	9	0
BAY-1082439	ENSG00000051382.8	PIK3CB	Fall	0	9
GARLIC	ENSG00000198959.11	TGM2	Fall	7	0
GARLIC	ENSG00000198959.11	TGM2	Spring	0	6
HESPERADIN	ENSG00000148053.15	NTRK2	Summer	6	1
ESFLURBIPROFEN	ENSG00000073756.11	PTGS2	Summer	7	0
EDOXABAN TOSYLATE	ENSG00000126218.11	F10	Summer	6	0
CHEMBL223575	ENSG00000166851.14	PLK1	Fall	9	0
MIRABEGRON	ENSG00000100197.20	CYP2D6	Fall	6	0
PANITUMUMAB	ENSG00000163235.15	TGFA	Spring	6	0
ILORASERTIB	ENSG00000091436.16	MAP3K20	Spring	0	6
AVOBENZONE	ENSG00000042088.13	TDP1	Winter	7	0
COLCHICINE	ENSG00000100197.20	CYP2D6	Fall	6	0
DIBUTYLDICHLOROSTANNANE	ENSG00000112033.13	PPARD	Fall	6	0
DEXAMETHASONE	ENSG00000198417.6	MT1F	Fall	6	0
RESVERATROL	ENSG00000059804.15	SLC2A3	Summer	6	0
RESVERATROL	ENSG00000059804.15	SLC2A3	Winter	0	6
PYRILAMINE	ENSG00000100197.20	CYP2D6	Fall	6	0
CARFILZOMIB	ENSG00000100804.18	PSMB5	Fall	0	6
SOMAVARATAN	ENSG00000259384.6	GH1	Fall	8	0
ME-344	ENSG00000178127.12	NDUFV2	Fall	1	6
SP-600125	ENSG00000105287.12	PRKD2	Fall	7	0
(S)-FTY720P	ENSG00000170989.8	S1PR1	Fall	8	1
(S)-FTY720P	ENSG00000170989.8	S1PR1	Spring	0	6
RABEPRAZOLE SODIUM	ENSG00000102755.11	FLT1	Winter	1	8
(S)-AMPA	ENSG00000100197.20	CYP2D6	Fall	6	0
DICLOFENAC EPOLAMINE	ENSG00000073756.11	PTGS2	Summer	7	0
GLAFENINE	ENSG00000100197.20	CYP2D6	Fall	6	0
BELINOSTAT	ENSG00000061273.17	HDAC7	Fall	12	0
CENISERTIB	ENSG00000061938.16	TNK2	Fall	6	0
CHEMBL233611	ENSG00000130164.13	LDLR	Fall	10	0
CHEMBL233611	ENSG00000130164.13	LDLR	Winter	1	7
ETODOLAC	ENSG00000073756.11	PTGS2	Summer	7	0
CHEMBL601364	ENSG00000108773.10	KAT2A	Summer	0	6
CHEMBL532452	ENSG00000002016.17	RAD52	Fall	6	0
STREPTONIGRIN	ENSG00000101751.10	POLI	Summer	0	6
TIOTROPIUM	ENSG00000100197.20	CYP2D6	Fall	6	0
CYANOPEPTOLIN S	ENSG00000010438.16	PRSS3	Fall	0	6
PIROXICAM	ENSG00000100031.18	GGT1	Summer	0	6
THIOGUANOSINE	ENSG00000166851.14	PLK1	Fall	9	0
CYCLOFENIL	ENSG00000106211.8	HSPB1	Fall	10	0
CYCLOFENIL	ENSG00000106211.8	HSPB1	Winter	0	13
PF-00562271	ENSG00000061938.16	TNK2	Fall	6	0
DISULFIRAM	ENSG00000112033.13	PPARD	Fall	6	0
DEXAMETHASONE	ENSG00000100197.20	CYP2D6	Fall	6	0
CHEMBL2062862	ENSG00000168610.14	STAT3	Spring	0	6
CYCLOSPORINE	ENSG00000175197.11	DDIT3	Winter	0	6
DYCLONINE	ENSG00000100197.20	CYP2D6	Fall	6	0
DOXORUBICIN HYDROCHLORIDE	ENSG00000112033.13	PPARD	Fall	6	0
MECLIZINE	ENSG00000100197.20	CYP2D6	Fall	6	0
BMS-986104	ENSG00000170989.8	S1PR1	Fall	8	1
BMS-986104	ENSG00000170989.8	S1PR1	Spring	0	6
APITOLISIB	ENSG00000000938.12	FGR	Fall	9	0
BI-2536	ENSG00000173846.12	PLK3	Winter	0	7
CEPHAPIRIN SODIUM	ENSG00000042088.13	TDP1	Winter	7	0
TIMOLOL	ENSG00000100197.20	CYP2D6	Fall	6	0
CHEMBL1169388	ENSG00000108773.10	KAT2A	Summer	0	6
6,4'-DIMETHOXYFLAVONE	ENSG00000077150.18	NFKB2	Fall	11	0
6,4'-DIMETHOXYFLAVONE	ENSG00000077150.18	NFKB2	Winter	0	6
TOMARALIMAB	ENSG00000137462.6	TLR2	Summer	0	13
GRINIMIBINE	ENSG00000100219.16	XBP1	Summer	7	0
ACETAMINOPHEN	ENSG00000100197.20	CYP2D6	Fall	6	0
DASATINIB	ENSG00000000938.12	FGR	Fall	9	0
METHYLINOSITOL	ENSG00000142192.20	APP	Summer	7	0
NICLOSAMIDE	ENSG00000100197.20	CYP2D6	Fall	6	0
ESOXYBUTYNIN	ENSG00000100197.20	CYP2D6	Fall	6	0
HESPERADIN	ENSG00000013441.15	CLK1	Spring	7	0
PROTOPORPHYRIN	ENSG00000101751.10	POLI	Summer	0	6
INSULIN	ENSG00000171223.5	JUNB	Fall	6	0
INSULIN	ENSG00000171223.5	JUNB	Winter	0	8
HYDROMORPHONE	ENSG00000100197.20	CYP2D6	Fall	6	0
CHEMBL225519	ENSG00000198355.4	PIM3	Fall	7	0
CHEMBL225519	ENSG00000198355.4	PIM3	Winter	1	9
TAE-684	ENSG00000164543.5	STK17A	Summer	6	2
OSI-930	ENSG00000102755.11	FLT1	Winter	1	8
NECITUMUMAB	ENSG00000146648.17	EGFR	Summer	0	6
CEP-5214	ENSG00000102755.11	FLT1	Winter	1	8
ICRUCUMAB	ENSG00000102755.11	FLT1	Winter	1	8
ONTAMALIMAB	ENSG00000099866.14	MADCAM1	Fall	7	0
LEVOTHYROXINE	ENSG00000178726.6	THBD	Fall	9	1
LEVOTHYROXINE	ENSG00000178726.6	THBD	Winter	0	9
TUCATINIB	ENSG00000146648.17	EGFR	Summer	0	6
HYDROXYZINE PAMOATE	ENSG00000166851.14	PLK1	Fall	9	0
CHEMBL1687979	ENSG00000168610.14	STAT3	Spring	0	6
MITONAFIDE	ENSG00000101751.10	POLI	Summer	0	6
CLOZAPINE	ENSG00000198502.5	HLA-DRB5	Spring	0	13
CLOZAPINE	ENSG00000198502.5	HLA-DRB5	Summer	10	0
ISOVELLERAL	ENSG00000170989.8	S1PR1	Fall	8	1
ISOVELLERAL	ENSG00000170989.8	S1PR1	Spring	0	6
DAPHNORIN	ENSG00000042088.13	TDP1	Winter	7	0
FENOPROFEN CALCIUM	ENSG00000073756.11	PTGS2	Summer	7	0
CHEMBL225519	ENSG00000176444.18	CLK2	Fall	6	0
ALCOHOL	ENSG00000146648.17	EGFR	Summer	0	6
CLOFIBRATE	ENSG00000100197.20	CYP2D6	Fall	6	0
VINCRISTINE	ENSG00000137285.9	TUBB2B	Fall	8	0
CHEMBL594772	ENSG00000112033.13	PPARD	Fall	6	0
LODOXAMIDE	ENSG00000178623.11	GPR35	Fall	16	0
LODOXAMIDE	ENSG00000178623.11	GPR35	Winter	0	17
THALIDOMIDE	ENSG00000122863.5	CHST3	Fall	7	1
LAROTRECTINIB	ENSG00000148053.15	NTRK2	Summer	6	1
RETINYLRETINOATE	ENSG00000131759.17	RARA	Winter	0	7
RETINOL	ENSG00000131759.17	RARA	Winter	0	7
AZD-5438	ENSG00000185324.21	CDK10	Fall	8	0
SORAFENIB	ENSG00000148053.15	NTRK2	Summer	6	1
CHEMBL596836	ENSG00000002016.17	RAD52	Fall	6	0
RETASPIMYCIN	ENSG00000096384.19	HSP90AB1	Summer	6	0
PECTOLINARIGENIN	ENSG00000077150.18	NFKB2	Fall	11	0
PECTOLINARIGENIN	ENSG00000077150.18	NFKB2	Winter	0	6
CHEMBL2062863	ENSG00000168610.14	STAT3	Spring	0	6
PEXELIZUMAB	ENSG00000106804.7	C5	Summer	0	8
PEGINESATIDE	ENSG00000187266.13	EPOR	Winter	0	6
APOMAB	ENSG00000120889.12	TNFRSF10B	Fall	8	0
YUANHUADINE	ENSG00000146648.17	EGFR	Summer	0	6
THUNBERGINOL B	ENSG00000162551.13	ALPL	Fall	6	0
VALPROIC ACID	ENSG00000061273.17	HDAC7	Fall	12	0
XL-888	ENSG00000096384.19	HSP90AB1	Summer	6	0
CHEMBL1701915	ENSG00000161800.12	RACGAP1	Spring	8	1
CDP840	ENSG00000184588.17	PDE4B	Summer	6	0
CHEMBL256967	ENSG00000100906.10	NFKBIA	Winter	1	6
AMLEXANOX	ENSG00000065989.15	PDE4A	Spring	6	0
LORATADINE	ENSG00000100197.20	CYP2D6	Fall	6	0
CLOFIBRIC ACID	ENSG00000100197.20	CYP2D6	Fall	6	0
5-NITRO-2-PHENYLPROPYLAMINOBENZOIC ACID [NPPB]	ENSG00000044574.7	HSPA5	Summer	7	0
PHA-793887	ENSG00000185324.21	CDK10	Fall	8	0
RINDOPEPIMUT	ENSG00000146648.17	EGFR	Summer	0	6
DEXAMETHASONE	ENSG00000131759.17	RARA	Winter	0	7
SEMULOPARIN	ENSG00000126218.11	F10	Summer	6	0
HARMINE	ENSG00000179335.18	CLK3	Fall	6	0
CHEMBL590675	ENSG00000161800.12	RACGAP1	Spring	8	1
CHEMBL1459280	ENSG00000166851.14	PLK1	Fall	9	0
MONTELUKAST	ENSG00000100197.20	CYP2D6	Fall	6	0
PIPENZOLATE	ENSG00000100197.20	CYP2D6	Fall	6	0
RACLOPRIDE	ENSG00000100197.20	CYP2D6	Fall	6	0
EMETINE	ENSG00000100644.16	HIF1A	Fall	6	0
EMETINE	ENSG00000100644.16	HIF1A	Spring	1	8
CHEMBL505807	ENSG00000162551.13	ALPL	Fall	6	0
HINOKITIOL	ENSG00000048052.21	HDAC9	Fall	0	6
HYDROCHLOROTHIAZIDE	ENSG00000148737.16	TCF7L2	Fall	6	0
GUAIFENESIN	ENSG00000100197.20	CYP2D6	Fall	6	0
DROPERIDOL	ENSG00000100197.20	CYP2D6	Fall	6	0
BORTEZOMIB	ENSG00000148400.9	NOTCH1	Fall	8	2
CYTARABINE	ENSG00000170606.14	HSPA4	Summer	6	0
CHARTREUSIN	ENSG00000101751.10	POLI	Summer	0	6
CHEMBL324053	ENSG00000100429.17	HDAC10	Fall	10	0
DAPHNORIN	ENSG00000185513.14	L3MBTL1	Fall	6	0
DAPHNORIN	ENSG00000185513.14	L3MBTL1	Summer	0	6
EMODIC ACID	ENSG00000101751.10	POLI	Summer	0	6
BELINOSTAT	ENSG00000048052.21	HDAC9	Fall	0	6
IMIDACLOPRID	ENSG00000166851.14	PLK1	Fall	9	0
MIPOMERSEN	ENSG00000130164.13	LDLR	Fall	10	0
MIPOMERSEN	ENSG00000130164.13	LDLR	Winter	1	7
IODOACETAMIDE	ENSG00000108773.10	KAT2A	Summer	0	6
GO-6976	ENSG00000105287.12	PRKD2	Fall	7	0
CHEMBL1288253	ENSG00000124588.19	NQO2	Fall	0	9
CHEMBL1288253	ENSG00000124588.19	NQO2	Spring	8	0
SU-014813	ENSG00000102755.11	FLT1	Winter	1	8
(R)-PINOCEMBRIN	ENSG00000100197.20	CYP2D6	Fall	6	0
THEOPHYLLINE SODIUM GLYCINATE	ENSG00000184588.17	PDE4B	Summer	6	0
CHEMBL1310138	ENSG00000108773.10	KAT2A	Summer	0	6
RG-4733	ENSG00000148400.9	NOTCH1	Fall	8	2
THALIDOMIDE	ENSG00000203747.10	FCGR3A	Fall	6	1
CHEMBL38508	ENSG00000108773.10	KAT2A	Summer	0	6
AURINTRICARBOXYLIC ACID	ENSG00000101751.10	POLI	Summer	0	6
DIPYRIDAMOLE	ENSG00000065989.15	PDE4A	Spring	6	0
CLEMASTINE	ENSG00000100197.20	CYP2D6	Fall	6	0
GAMOLENIC ACID	ENSG00000101751.10	POLI	Summer	0	6
OMIPALISIB	ENSG00000105221.16	AKT2	Fall	9	0
PICLAMILAST	ENSG00000184588.17	PDE4B	Summer	6	0
TOZASERTIB	ENSG00000146648.17	EGFR	Summer	0	6
SANGUINARIUM	ENSG00000112033.13	PPARD	Fall	6	0
EQUILIN	ENSG00000161800.12	RACGAP1	Spring	8	1
(R,S)-IFENPRODIL	ENSG00000100197.20	CYP2D6	Fall	6	0
IDEBENONE	ENSG00000112033.13	PPARD	Fall	6	0
SANGUINARINE SULFATE	ENSG00000108773.10	KAT2A	Summer	0	6
RG-1530	ENSG00000173846.12	PLK3	Winter	0	7
NAVITOCLAX	ENSG00000101751.10	POLI	Summer	0	6
MITOXANTRONE HYDROCHLORIDE	ENSG00000161800.12	RACGAP1	Spring	8	1
ELLAGIC ACID	ENSG00000166851.14	PLK1	Fall	9	0
PROMAZINE	ENSG00000100197.20	CYP2D6	Fall	6	0
LY-3164530	ENSG00000146648.17	EGFR	Summer	0	6
VALDECOXIB	ENSG00000073756.11	PTGS2	Summer	7	0
ADAVOSERTIB	ENSG00000130669.17	PAK4	Fall	6	0
CHEMBL1451216	ENSG00000166851.14	PLK1	Fall	9	0
PURPURIN	ENSG00000166851.14	PLK1	Fall	9	0
HYDRALAZINE	ENSG00000090534.17	THPO	Fall	6	0
LYCOPENE	ENSG00000131759.17	RARA	Winter	0	7
BORTEZOMIB	ENSG00000129084.17	PSMA1	Fall	0	6
DESIPRAMINE	ENSG00000100197.20	CYP2D6	Fall	6	0
CHEMBL1224755	ENSG00000100219.16	XBP1	Summer	7	0
NICOTINE	ENSG00000169567.11	HINT1	Fall	1	6
CEFSULODIN SODIUM	ENSG00000101751.10	POLI	Summer	0	6
TYRPHOSTIN 23	ENSG00000162551.13	ALPL	Fall	6	0
ENTINOSTAT	ENSG00000048052.21	HDAC9	Fall	0	6
ISOBOLDINE	ENSG00000100197.20	CYP2D6	Fall	6	0
CHIAURANIB	ENSG00000102755.11	FLT1	Winter	1	8
EMAPALUMAB	ENSG00000101966.12	XIAP	Spring	0	6
SONEPCIZUMAB	ENSG00000170989.8	S1PR1	Fall	8	1
SONEPCIZUMAB	ENSG00000170989.8	S1PR1	Spring	0	6
AEE-788	ENSG00000146648.17	EGFR	Summer	0	6
ERDAFITINIB	ENSG00000146648.17	EGFR	Summer	0	6
MELAGATRAN	ENSG00000204983.13	PRSS1	Spring	9	0
NICOTINE	ENSG00000093010.13	COMT	Fall	7	0
ASPIRIN	ENSG00000187800.13	PEAR1	Fall	6	0
GW7647	ENSG00000108773.10	KAT2A	Summer	0	6
CHEMBL1363249	ENSG00000166851.14	PLK1	Fall	9	0
PALMATINE CHLORIDE	ENSG00000002016.17	RAD52	Fall	6	0
LITHIUM	ENSG00000093010.13	COMT	Fall	7	0
CHEMBL578502	ENSG00000011304.19	PTBP1	Fall	6	1
PHENYLBUTAZONE	ENSG00000163631.16	ALB	Fall	0	8
PHENYLBUTAZONE	ENSG00000163631.16	ALB	Summer	10	0
CHEMBL56731	ENSG00000100644.16	HIF1A	Fall	6	0
CHEMBL56731	ENSG00000100644.16	HIF1A	Spring	1	8
FLUPIRTINE MALEATE	ENSG00000101751.10	POLI	Summer	0	6
GLESATINIB	ENSG00000102755.11	FLT1	Winter	1	8
HYDROXYSTILBAMIDINE ISETHIONATE	ENSG00000161800.12	RACGAP1	Spring	8	1
ALTIRATINIB	ENSG00000148053.15	NTRK2	Summer	6	1
ZOLANTIDINE	ENSG00000100197.20	CYP2D6	Fall	6	0
WX-554	ENSG00000034152.18	MAP2K3	Fall	7	3
WX-554	ENSG00000034152.18	MAP2K3	Winter	1	11
GEFITINIB	ENSG00000105287.12	PRKD2	Fall	7	0
EVEROLIMUS	ENSG00000146648.17	EGFR	Summer	0	6
FENOPROFEN	ENSG00000073756.11	PTGS2	Summer	7	0
GO-6976	ENSG00000102755.11	FLT1	Winter	1	8
OPROZOMIB	ENSG00000129084.17	PSMA1	Fall	0	6
TRASTUZUMAB	ENSG00000203747.10	FCGR3A	Fall	6	1
VINCRISTINE	ENSG00000124574.14	ABCC10	Fall	6	0
CHEMBL1346025	ENSG00000115233.11	PSMD14	Fall	0	7
GLUTETHIMIDE	ENSG00000100197.20	CYP2D6	Fall	6	0
GW843682X	ENSG00000173846.12	PLK3	Winter	0	7
SCRIPTAID	ENSG00000100429.17	HDAC10	Fall	10	0
APTIGANEL	ENSG00000100197.20	CYP2D6	Fall	6	0
EPIGALLOCATECHIN	ENSG00000163631.16	ALB	Fall	0	8
EPIGALLOCATECHIN	ENSG00000163631.16	ALB	Summer	10	0
NORSTICTIC ACID	ENSG00000042088.13	TDP1	Winter	7	0
4-CHLOROMERCURIBENZOIC ACID	ENSG00000101751.10	POLI	Summer	0	6
CHEMBL1169388	ENSG00000090534.17	THPO	Fall	6	0
SIROLIMUS	ENSG00000118046.14	STK11	Fall	6	0
FLUFENAMIC ACID	ENSG00000100644.16	HIF1A	Fall	6	0
FLUFENAMIC ACID	ENSG00000100644.16	HIF1A	Spring	1	8
OCRIPLASMIN	ENSG00000130702.15	LAMA5	Fall	6	0
CISPLATIN	ENSG00000170606.14	HSPA4	Summer	6	0
QUISINOSTAT	ENSG00000048052.21	HDAC9	Fall	0	6
MEFENAMIC ACID	ENSG00000042088.13	TDP1	Winter	7	0
SEMAPIMOD	ENSG00000188130.13	MAPK12	Fall	6	0
SEMAPIMOD	ENSG00000188130.13	MAPK12	Summer	0	6
CHEMBL512908	ENSG00000101751.10	POLI	Summer	0	6
VITAMIN E	ENSG00000100979.14	PLTP	Fall	7	0
SELITRECTINIB	ENSG00000148053.15	NTRK2	Summer	6	1
CHEMBL1576310	ENSG00000115233.11	PSMD14	Fall	0	7
JNJ-7706621	ENSG00000176444.18	CLK2	Fall	6	0
ETRASIMOD	ENSG00000170989.8	S1PR1	Fall	8	1
ETRASIMOD	ENSG00000170989.8	S1PR1	Spring	0	6
CHEMBL528373	ENSG00000166851.14	PLK1	Fall	9	0
PI-CLONIDINE	ENSG00000100197.20	CYP2D6	Fall	6	0
CISPLATIN	ENSG00000148053.15	NTRK2	Summer	6	1
CHEMBL324053	ENSG00000061273.17	HDAC7	Fall	12	0
ATENOLOL	ENSG00000135744.7	AGT	Fall	7	0
ROSE BENGAL	ENSG00000108773.10	KAT2A	Summer	0	6
OPRELVEKIN	ENSG00000137070.17	IL11RA	Fall	6	0
OPRELVEKIN	ENSG00000137070.17	IL11RA	Summer	2	9
FAGARONINE	ENSG00000002016.17	RAD52	Fall	6	0
CHEMBL523200	ENSG00000100219.16	XBP1	Summer	7	0
STICTIC ACID	ENSG00000116030.16	SUMO1	Fall	0	7
XAMOTEROL FUMARATE	ENSG00000161800.12	RACGAP1	Spring	8	1
DAUNORUBICIN HYDROCHLORIDE	ENSG00000096384.19	HSP90AB1	Summer	6	0
CHEMBL1438389	ENSG00000100644.16	HIF1A	Fall	6	0
CHEMBL1438389	ENSG00000100644.16	HIF1A	Spring	1	8
CARBENOXOLONE	ENSG00000187513.8	GJA4	Winter	1	9
BMS-690514	ENSG00000102755.11	FLT1	Winter	1	8
ASP-4058	ENSG00000170989.8	S1PR1	Fall	8	1
ASP-4058	ENSG00000170989.8	S1PR1	Spring	0	6
PROPOFOL	ENSG00000196689.11	TRPV1	Fall	10	0
CHEMBL35482	ENSG00000123358.19	NR4A1	Winter	0	12
BUTYLATED HYDROXYTOLUENE	ENSG00000100197.20	CYP2D6	Fall	6	0
ISOQUINE	ENSG00000100197.20	CYP2D6	Fall	6	0
DOCETAXEL	ENSG00000137285.9	TUBB2B	Fall	8	0
FENRETINIDE	ENSG00000090534.17	THPO	Fall	6	0
PACLITAXEL	ENSG00000176014.12	TUBB6	Winter	3	8
VINORELBINE TARTRATE	ENSG00000137285.9	TUBB2B	Fall	8	0
CHEMBL146710	ENSG00000101751.10	POLI	Summer	0	6
CARFILZOMIB	ENSG00000142507.9	PSMB6	Fall	1	6
OLSALAZINE SODIUM	ENSG00000073756.11	PTGS2	Summer	7	0
CISPLATIN	ENSG00000173638.18	SLC19A1	Fall	6	0
LAPACHONE	ENSG00000090534.17	THPO	Fall	6	0
GW441756X	ENSG00000164543.5	STK17A	Summer	6	2
MAVATREP	ENSG00000196689.11	TRPV1	Fall	10	0
TELMISARTAN	ENSG00000111664.10	GNB3	Summer	6	0
TELMISARTAN	ENSG00000111664.10	GNB3	Winter	0	7
4,4'-THIODIANILINE	ENSG00000161800.12	RACGAP1	Spring	8	1
CHEMBL434063	ENSG00000100197.20	CYP2D6	Fall	6	0
COCAINE	ENSG00000114200.9	BCHE	Summer	8	2
KETOPROFEN	ENSG00000100197.20	CYP2D6	Fall	6	0
GDC-0152	ENSG00000101966.12	XIAP	Spring	0	6
CHEMBL528181	ENSG00000100219.16	XBP1	Summer	7	0
MERSALYL	ENSG00000108773.10	KAT2A	Summer	0	6
MERCAPTOPURINE	ENSG00000196735.11	HLA-DQA1	Fall	1	8
AMILORIDE	ENSG00000162572.20	SCNN1D	Fall	11	0
AMILORIDE	ENSG00000162572.20	SCNN1D	Summer	0	11
CHEMBL541400	ENSG00000105287.12	PRKD2	Fall	7	0
VATALANIB	ENSG00000102755.11	FLT1	Winter	1	8
SUMATRIPTAN	ENSG00000093010.13	COMT	Fall	7	0
SAGOPILONE	ENSG00000176014.12	TUBB6	Winter	3	8
SOFALCONE	ENSG00000108773.10	KAT2A	Summer	0	6
USTEKINUMAB	ENSG00000118503.14	TNFAIP3	Winter	0	6
CARBAMAZEPINE	ENSG00000242252.1	BGLAP	Fall	7	0
CARBAMAZEPINE	ENSG00000242252.1	BGLAP	Winter	0	7
KZR-616	ENSG00000100804.18	PSMB5	Fall	0	6
L-765314	ENSG00000090534.17	THPO	Fall	6	0
BGT-226	ENSG00000051382.8	PIK3CB	Fall	0	9
MELPHALAN	ENSG00000178814.16	OPLAH	Fall	12	0
TETRACYCLINE	ENSG00000096384.19	HSP90AB1	Summer	6	0
CABOZANTINIB	ENSG00000146648.17	EGFR	Summer	0	6
ZALCITABINE	ENSG00000170606.14	HSPA4	Summer	6	0
PYROTINIB	ENSG00000146648.17	EGFR	Summer	0	6
IMATINIB	ENSG00000146648.17	EGFR	Summer	0	6
CEFOTETAN	ENSG00000101751.10	POLI	Summer	0	6
DAIDZEIN	ENSG00000100197.20	CYP2D6	Fall	6	0
CHEMBL598663	ENSG00000162551.13	ALPL	Fall	6	0
ALISERTIB	ENSG00000198355.4	PIM3	Fall	7	0
ALISERTIB	ENSG00000198355.4	PIM3	Winter	1	9
DAUNORUBICIN	ENSG00000164867.10	NOS3	Fall	8	2
DAUNORUBICIN	ENSG00000164867.10	NOS3	Winter	0	9
CHEMBL210618	ENSG00000105287.12	PRKD2	Fall	7	0
CEPHALOTHIN SODIUM	ENSG00000042088.13	TDP1	Winter	7	0
CHEMBL541400	ENSG00000198355.4	PIM3	Fall	7	0
CHEMBL541400	ENSG00000198355.4	PIM3	Winter	1	9
PROPYLPYRAZOLETRIOL	ENSG00000100644.16	HIF1A	Fall	6	0
PROPYLPYRAZOLETRIOL	ENSG00000100644.16	HIF1A	Spring	1	8
ECADOTRIL	ENSG00000100197.20	CYP2D6	Fall	6	0
LAUROGUADINE	ENSG00000105221.16	AKT2	Fall	9	0
INDOMETHACIN	ENSG00000100031.18	GGT1	Summer	0	6
ALICAFORSEN	ENSG00000090339.8	ICAM1	Fall	7	0
CHEMBL1534034	ENSG00000101751.10	POLI	Summer	0	6
ACALISIB	ENSG00000051382.8	PIK3CB	Fall	0	9
UPADACITINIB	ENSG00000100197.20	CYP2D6	Fall	6	0
ACRIFLAVINE	ENSG00000101751.10	POLI	Summer	0	6
MONOCILLIN I	ENSG00000096384.19	HSP90AB1	Summer	6	0
LUTEOLIN	ENSG00000101751.10	POLI	Summer	0	6
TRETINOIN	ENSG00000131759.17	RARA	Winter	0	7
METHIONINE	ENSG00000144908.13	ALDH1L1	Summer	0	6
VARESPLADIB METHYL	ENSG00000188257.10	PLA2G2A	Fall	7	0
SULPIRIDE	ENSG00000100197.20	CYP2D6	Fall	6	0
CUCURBITACIN E	ENSG00000168610.14	STAT3	Spring	0	6
MORPHINE	ENSG00000179094.15	PER1	Fall	10	0
MK-0873	ENSG00000065989.15	PDE4A	Spring	6	0
TRIAMTERENE	ENSG00000162572.20	SCNN1D	Fall	11	0
TRIAMTERENE	ENSG00000162572.20	SCNN1D	Summer	0	11
VB-201	ENSG00000073756.11	PTGS2	Summer	7	0
IXABEPILONE	ENSG00000137285.9	TUBB2B	Fall	8	0
CAFFEINE	ENSG00000184588.17	PDE4B	Summer	6	0
AMITRIPTYLINE	ENSG00000100197.20	CYP2D6	Fall	6	0
NERISPIRDINE	ENSG00000102057.9	KCND1	Spring	0	6
MANNITOL	ENSG00000100031.18	GGT1	Summer	0	6
DEMETHYLWEDELOLACTONE	ENSG00000100906.10	NFKBIA	Winter	1	6
GUTHION	ENSG00000108773.10	KAT2A	Summer	0	6
VINCRISTINE SULFATE	ENSG00000137285.9	TUBB2B	Fall	8	0
ESTRAMUSTINE	ENSG00000042088.13	TDP1	Winter	7	0
DORSOMORPHIN	ENSG00000142627.12	EPHA2	Winter	0	8
BORTEZOMIB	ENSG00000106588.10	PSMA2	Fall	0	7
GALLAMINE	ENSG00000108773.10	KAT2A	Summer	0	6
PHENYLBUTANOIC ACID	ENSG00000061273.17	HDAC7	Fall	12	0
PAROXETINE	ENSG00000093010.13	COMT	Fall	7	0
INDOMETHACIN	ENSG00000160255.17	ITGB2	Summer	0	7
CLOMIPRAMINE	ENSG00000100197.20	CYP2D6	Fall	6	0
BENZIDINE	ENSG00000161800.12	RACGAP1	Spring	8	1
DAUNORUBICIN	ENSG00000048052.21	HDAC9	Fall	0	6
CURCUMIN	ENSG00000074410.13	CA12	Fall	7	0
JNJ-26483327	ENSG00000146648.17	EGFR	Summer	0	6
CHEMBL586163	ENSG00000101751.10	POLI	Summer	0	6
PYROGALLOL RED	ENSG00000166851.14	PLK1	Fall	9	0
DACTOLISIB	ENSG00000133056.13	PIK3C2B	Summer	6	1
RG-1530	ENSG00000164543.5	STK17A	Summer	6	2
AFLIBERCEPT	ENSG00000119630.13	PGF	Summer	7	0
TERBINAFINE	ENSG00000100197.20	CYP2D6	Fall	6	0
ZIDOVUDINE	ENSG00000243678.11	NME2	Winter	0	6
E163	ENSG00000073756.11	PTGS2	Summer	7	0
SLAZINIC ACID	ENSG00000042088.13	TDP1	Winter	7	0
AMBUNOL	ENSG00000166851.14	PLK1	Fall	9	0
AZATHIOPRINE SODIUM	ENSG00000128059.8	PPAT	Spring	0	7
MONTELUKAST SODIUM	ENSG00000101751.10	POLI	Summer	0	6
BUSULFAN	ENSG00000186716.20	BCR	Spring	0	6
HYDROXYZINE	ENSG00000100197.20	CYP2D6	Fall	6	0
TOLCAPONE	ENSG00000178623.11	GPR35	Fall	16	0
TOLCAPONE	ENSG00000178623.11	GPR35	Winter	0	17
ZAMPANOLIDE	ENSG00000176014.12	TUBB6	Winter	3	8
MIDOSTAURIN	ENSG00000170606.14	HSPA4	Summer	6	0
HYCANTHONE	ENSG00000112033.13	PPARD	Fall	6	0
DORSOMORPHIN	ENSG00000102755.11	FLT1	Winter	1	8
ADUCANUMAB	ENSG00000142192.20	APP	Summer	7	0
MORIN	ENSG00000101751.10	POLI	Summer	0	6
ILORASERTIB	ENSG00000102755.11	FLT1	Winter	1	8
BAPINEUZUMAB	ENSG00000142192.20	APP	Summer	7	0
INK-1117	ENSG00000051382.8	PIK3CB	Fall	0	9
R-406	ENSG00000188130.13	MAPK12	Fall	6	0
R-406	ENSG00000188130.13	MAPK12	Summer	0	6
BMS-690514	ENSG00000146648.17	EGFR	Summer	0	6
VS-5584	ENSG00000051382.8	PIK3CB	Fall	0	9
PHENYLMERCURIC ACETATE	ENSG00000042088.13	TDP1	Winter	7	0
SUPROFEN	ENSG00000073756.11	PTGS2	Summer	7	0
ETIDRONIC ACID	ENSG00000242252.1	BGLAP	Fall	7	0
ETIDRONIC ACID	ENSG00000242252.1	BGLAP	Winter	0	7
FORETINIB	ENSG00000102755.11	FLT1	Winter	1	8
CHEMBL463783	ENSG00000161800.12	RACGAP1	Spring	8	1
ME-344	ENSG00000165264.10	NDUFB6	Fall	0	9
CUDC-101	ENSG00000100429.17	HDAC10	Fall	10	0
CHEMBL521171	ENSG00000101751.10	POLI	Summer	0	6
N-SULFOGLUCOSAMINE SULFOHYDROLASE RECOMBINANT	ENSG00000181523.12	SGSH	Fall	8	1
ME-344	ENSG00000189043.9	NDUFA4	Fall	2	6
HYDROXYCHLOROQUINE	ENSG00000073756.11	PTGS2	Summer	7	0
METHOTREXATE	ENSG00000173638.18	SLC19A1	Fall	6	0
DIOXYBENZONE	ENSG00000100644.16	HIF1A	Fall	6	0
DIOXYBENZONE	ENSG00000100644.16	HIF1A	Spring	1	8
BELACTOSIN A	ENSG00000100804.18	PSMB5	Fall	0	6
TRAMETINIB	ENSG00000146648.17	EGFR	Summer	0	6
GUTHION	ENSG00000166851.14	PLK1	Fall	9	0
THAPSIGARGIN	ENSG00000044574.7	HSPA5	Summer	7	0
HEPARIN	ENSG00000126218.11	F10	Summer	6	0
NICLOSAMIDE	ENSG00000090534.17	THPO	Fall	6	0
FASUDIL	ENSG00000100197.20	CYP2D6	Fall	6	0
TAMOXIFEN CITRATE	ENSG00000100197.20	CYP2D6	Fall	6	0
CHEMBL591126	ENSG00000100197.20	CYP2D6	Fall	6	0
CHEMBL1601846	ENSG00000101751.10	POLI	Summer	0	6
APIGENIN	ENSG00000165168.7	CYBB	Fall	2	7
IBRUTINIB	ENSG00000100197.20	CYP2D6	Fall	6	0
XL-999	ENSG00000102755.11	FLT1	Winter	1	8
SC-560	ENSG00000073756.11	PTGS2	Summer	7	0
CHEMBL461193	ENSG00000002016.17	RAD52	Fall	6	0
LUTEOLIN	ENSG00000120889.12	TNFRSF10B	Fall	8	0
R-406	ENSG00000102755.11	FLT1	Winter	1	8
AR-42	ENSG00000100429.17	HDAC10	Fall	10	0
CISPLATIN	ENSG00000146648.17	EGFR	Summer	0	6
IRBESARTAN	ENSG00000135744.7	AGT	Fall	7	0
METHACYCLINE HYDROCHLORIDE	ENSG00000101751.10	POLI	Summer	0	6
AZD-1080	ENSG00000198355.4	PIM3	Fall	7	0
AZD-1080	ENSG00000198355.4	PIM3	Winter	1	9
GW-406381	ENSG00000073756.11	PTGS2	Summer	7	0
CHEMBL106525	ENSG00000101751.10	POLI	Summer	0	6
CHEMBL579761	ENSG00000101751.10	POLI	Summer	0	6
BINIMETINIB	ENSG00000034152.18	MAP2K3	Fall	7	3
BINIMETINIB	ENSG00000034152.18	MAP2K3	Winter	1	11
CLONIDINE	ENSG00000100197.20	CYP2D6	Fall	6	0
VITAMIN E	ENSG00000175197.11	DDIT3	Winter	0	6
FLUOROURACIL	ENSG00000173638.18	SLC19A1	Fall	6	0
CHEMBL2036119	ENSG00000176014.12	TUBB6	Winter	3	8
AROFYLLINE	ENSG00000065989.15	PDE4A	Spring	6	0
NAPROXEN	ENSG00000073756.11	PTGS2	Summer	7	0
ARRY-797	ENSG00000188130.13	MAPK12	Fall	6	0
ARRY-797	ENSG00000188130.13	MAPK12	Summer	0	6
ISORHAMNETIN	ENSG00000077150.18	NFKB2	Fall	11	0
ISORHAMNETIN	ENSG00000077150.18	NFKB2	Winter	0	6
7-ETHYL-10-HYDROXYCAMPTOTHECIN	ENSG00000061273.17	HDAC7	Fall	12	0
CHEMBL429095	ENSG00000090534.17	THPO	Fall	6	0
CHEMBL2332783	ENSG00000106211.8	HSPB1	Fall	10	0
CHEMBL2332783	ENSG00000106211.8	HSPB1	Winter	0	13
BISMUTH SUBSALICYLATE	ENSG00000073756.11	PTGS2	Summer	7	0
CHEMBL171699	ENSG00000170989.8	S1PR1	Fall	8	1
CHEMBL171699	ENSG00000170989.8	S1PR1	Spring	0	6
PUROMYCIN	ENSG00000170606.14	HSPA4	Summer	6	0
NIROGACESTAT	ENSG00000148400.9	NOTCH1	Fall	8	2
ALSTERPAULLONE	ENSG00000130669.17	PAK4	Fall	6	0
PEMETREXED	ENSG00000173638.18	SLC19A1	Fall	6	0
ABIVERTINIB	ENSG00000146648.17	EGFR	Summer	0	6
N-ETHYLMALEIMIDE	ENSG00000090534.17	THPO	Fall	6	0
CLARITHROMYCIN	ENSG00000100197.20	CYP2D6	Fall	6	0
IRSOGLADINE MALEATE	ENSG00000101751.10	POLI	Summer	0	6
CANDESARTAN	ENSG00000104885.17	DOT1L	Fall	9	0
BIFONAZOLE	ENSG00000112033.13	PPARD	Fall	6	0
PRACINOSTAT	ENSG00000048052.21	HDAC9	Fall	0	6
ADALIMUMAB	ENSG00000056558.10	TRAF1	Fall	6	0
NOREPINEPHRINE BITARTRATE	ENSG00000100644.16	HIF1A	Fall	6	0
NOREPINEPHRINE BITARTRATE	ENSG00000100644.16	HIF1A	Spring	1	8
SPERMIDINE	ENSG00000090534.17	THPO	Fall	6	0
DIPHENYLPYRALINE	ENSG00000100197.20	CYP2D6	Fall	6	0
NV-128	ENSG00000189043.9	NDUFA4	Fall	2	6
ACETAMINOPHEN	ENSG00000109971.13	HSPA8	Summer	8	0
CHEMBL324053	ENSG00000048052.21	HDAC9	Fall	0	6
JUGLONE	ENSG00000108773.10	KAT2A	Summer	0	6
DOVITINIB	ENSG00000091436.16	MAP3K20	Spring	0	6
CAMPHOR	ENSG00000196689.11	TRPV1	Fall	10	0
CHEMBL598477	ENSG00000143727.15	ACP1	Fall	0	6
BERBERINE CHLORIDE	ENSG00000002016.17	RAD52	Fall	6	0
CARIPRAZINE	ENSG00000100197.20	CYP2D6	Fall	6	0
CONATUMUMAB	ENSG00000120889.12	TNFRSF10B	Fall	8	0
BERBERINE	ENSG00000100197.20	CYP2D6	Fall	6	0
SGI-1776	ENSG00000198355.4	PIM3	Fall	7	0
SGI-1776	ENSG00000198355.4	PIM3	Winter	1	9
HYDRALAZINE HYDROCHLORIDE	ENSG00000112033.13	PPARD	Fall	6	0
LEVODOPA	ENSG00000196689.11	TRPV1	Fall	10	0
INDIBULIN	ENSG00000137285.9	TUBB2B	Fall	8	0
AZACITIDINE	ENSG00000100031.18	GGT1	Summer	0	6
APICIDIN	ENSG00000061273.17	HDAC7	Fall	12	0
METHYLDOPA	ENSG00000093010.13	COMT	Fall	7	0
CHEMBL1956070	ENSG00000163482.11	STK36	Summer	0	8
PI-103	ENSG00000133056.13	PIK3C2B	Summer	6	1
BETUNOLIC ACID	ENSG00000166851.14	PLK1	Fall	9	0
R-1487	ENSG00000105287.12	PRKD2	Fall	7	0
XL-820	ENSG00000102755.11	FLT1	Winter	1	8
DICLOFENAC	ENSG00000100031.18	GGT1	Summer	0	6
ROTENONE	ENSG00000112033.13	PPARD	Fall	6	0
CHEMBL118417	ENSG00000112033.13	PPARD	Fall	6	0
CHEMBL287689	ENSG00000100644.16	HIF1A	Fall	6	0
CHEMBL287689	ENSG00000100644.16	HIF1A	Spring	1	8
METHYLDOPA	ENSG00000100197.20	CYP2D6	Fall	6	0
LINIFANIB	ENSG00000099875.14	MKNK2	Fall	8	0
LINIFANIB	ENSG00000099875.14	MKNK2	Winter	1	7
IODIPAMIDE	ENSG00000163631.16	ALB	Fall	0	8
IODIPAMIDE	ENSG00000163631.16	ALB	Summer	10	0
BORTEZOMIB	ENSG00000204983.13	PRSS1	Spring	9	0
CHEMBL202721	ENSG00000061938.16	TNK2	Fall	6	0
URB-597	ENSG00000074416.13	MGLL	Fall	2	8
NORTRIPTYLINE	ENSG00000111664.10	GNB3	Summer	6	0
NORTRIPTYLINE	ENSG00000111664.10	GNB3	Winter	0	7
PAPAVERINE	ENSG00000184588.17	PDE4B	Summer	6	0
ISOXSUPRINE	ENSG00000100197.20	CYP2D6	Fall	6	0
BENOXINATE HYDROCHLORIDE	ENSG00000002016.17	RAD52	Fall	6	0
RESVERATROL	ENSG00000077150.18	NFKB2	Fall	11	0
RESVERATROL	ENSG00000077150.18	NFKB2	Winter	0	6
CHEMBL56393	ENSG00000185513.14	L3MBTL1	Fall	6	0
CHEMBL56393	ENSG00000185513.14	L3MBTL1	Summer	0	6
CHEMBL103583	ENSG00000161800.12	RACGAP1	Spring	8	1
QUERCETIN	ENSG00000105287.12	PRKD2	Fall	7	0
DALFAMPRIDINE	ENSG00000100197.20	CYP2D6	Fall	6	0
CISPLATIN	ENSG00000093010.13	COMT	Fall	7	0
PATISIRAN	ENSG00000118271.9	TTR	Spring	7	0
CHEMBL84010	ENSG00000077150.18	NFKB2	Fall	11	0
CHEMBL84010	ENSG00000077150.18	NFKB2	Winter	0	6
AFURESERTIB	ENSG00000105221.16	AKT2	Fall	9	0
SEMAXANIB	ENSG00000102755.11	FLT1	Winter	1	8
CAMPTOTHECIN	ENSG00000051382.8	PIK3CB	Fall	0	9
MOMETASONE FUROATE	ENSG00000106211.8	HSPB1	Fall	10	0
MOMETASONE FUROATE	ENSG00000106211.8	HSPB1	Winter	0	13
GW501516	ENSG00000112033.13	PPARD	Fall	6	0
SORAFENIB	ENSG00000164867.10	NOS3	Fall	8	2
SORAFENIB	ENSG00000164867.10	NOS3	Winter	0	9
DORAMAPIMOD	ENSG00000105287.12	PRKD2	Fall	7	0
CATECHOL	ENSG00000100644.16	HIF1A	Fall	6	0
CATECHOL	ENSG00000100644.16	HIF1A	Spring	1	8
COBIPROSTONE	ENSG00000114859.15	CLCN2	Fall	7	1
NABUMETONE	ENSG00000073756.11	PTGS2	Summer	7	0
PENICILLIN V BENZATHINE	ENSG00000100197.20	CYP2D6	Fall	6	0
OCRIPLASMIN	ENSG00000187498.14	COL4A1	Summer	6	0
IRINOTECAN	ENSG00000126215.13	XRCC3	Fall	8	0
AR-42	ENSG00000048052.21	HDAC9	Fall	0	6
INTERLEUKIN-10	ENSG00000170276.5	HSPB2	Winter	0	8
CARBOPLATIN	ENSG00000108773.10	KAT2A	Summer	0	6
GSK-269962A	ENSG00000105221.16	AKT2	Fall	9	0
FLUOXETINE	ENSG00000100197.20	CYP2D6	Fall	6	0
DIHYDREXIDINE	ENSG00000090534.17	THPO	Fall	6	0
PKI-166	ENSG00000146648.17	EGFR	Summer	0	6
MEFENAMIC ACID	ENSG00000100644.16	HIF1A	Fall	6	0
MEFENAMIC ACID	ENSG00000100644.16	HIF1A	Spring	1	8
SETMELANOTIDE	ENSG00000258839.3	MC1R	Fall	14	0
SETMELANOTIDE	ENSG00000258839.3	MC1R	Spring	0	9
TRETINOIN	ENSG00000112033.13	PPARD	Fall	6	0
TOZASERTIB	ENSG00000148053.15	NTRK2	Summer	6	1
GW441756X	ENSG00000091436.16	MAP3K20	Spring	0	6
NRX195183	ENSG00000131759.17	RARA	Winter	0	7
NEFAZODONE	ENSG00000100197.20	CYP2D6	Fall	6	0
INDIGOTINDISULFONATE	ENSG00000101751.10	POLI	Summer	0	6
TRIPARANOL	ENSG00000112033.13	PPARD	Fall	6	0
CHEMBL1523215	ENSG00000161800.12	RACGAP1	Spring	8	1
DIMERCAPROL	ENSG00000042088.13	TDP1	Winter	7	0
CHEMBL85826	ENSG00000077150.18	NFKB2	Fall	11	0
CHEMBL85826	ENSG00000077150.18	NFKB2	Winter	0	6
PHENSERINE, (+)-	ENSG00000142192.20	APP	Summer	7	0
CHEMBL74121	ENSG00000100197.20	CYP2D6	Fall	6	0
CLEMIZOLE	ENSG00000100644.16	HIF1A	Fall	6	0
CLEMIZOLE	ENSG00000100644.16	HIF1A	Spring	1	8
HOMIDIUM BROMIDE	ENSG00000112033.13	PPARD	Fall	6	0
AMORFRUTIN A	ENSG00000166851.14	PLK1	Fall	9	0
XANTHOHUMOL	ENSG00000188130.13	MAPK12	Fall	6	0
XANTHOHUMOL	ENSG00000188130.13	MAPK12	Summer	0	6
DABIGATRAN	ENSG00000124588.19	NQO2	Fall	0	9
DABIGATRAN	ENSG00000124588.19	NQO2	Spring	8	0
CHEMBL515763	ENSG00000161800.12	RACGAP1	Spring	8	1
PYRIMETHAMINE	ENSG00000168610.14	STAT3	Spring	0	6
ADENOSINE TRIPHOSPHATE	ENSG00000244165.1	P2RY11	Fall	9	0
ERYTHROSINE	ENSG00000108773.10	KAT2A	Summer	0	6
CHEMBL477936	ENSG00000101751.10	POLI	Summer	0	6
CI-1040	ENSG00000118046.14	STK11	Fall	6	0
CHEMBL66114	ENSG00000100197.20	CYP2D6	Fall	6	0
CHEMBL599943	ENSG00000002016.17	RAD52	Fall	6	0
ROFLUMILAST	ENSG00000184588.17	PDE4B	Summer	6	0
AMINACRINE HYDROCHLORIDE	ENSG00000101751.10	POLI	Summer	0	6
ILORASERTIB	ENSG00000146648.17	EGFR	Summer	0	6
SORAFENIB	ENSG00000069956.11	MAPK6	Fall	0	9
WARFARIN	ENSG00000151006.7	PRSS53	Fall	8	0
ROSIGLITAZONE MALEATE	ENSG00000112033.13	PPARD	Fall	6	0
GEDATOLISIB	ENSG00000051382.8	PIK3CB	Fall	0	9
CHEMBL584452	ENSG00000002016.17	RAD52	Fall	6	0
ORANTINIB	ENSG00000146648.17	EGFR	Summer	0	6
ZIDOVUDINE	ENSG00000127948.15	POR	Fall	9	0
ZIDOVUDINE	ENSG00000127948.15	POR	Spring	0	8
CHEMBL1310138	ENSG00000166851.14	PLK1	Fall	9	0
PONESIMOD	ENSG00000170989.8	S1PR1	Fall	8	1
PONESIMOD	ENSG00000170989.8	S1PR1	Spring	0	6
CHEMBL481422	ENSG00000101966.12	XIAP	Spring	0	6
CISPLATIN	ENSG00000002016.17	RAD52	Fall	6	0
GDC-0917	ENSG00000101966.12	XIAP	Spring	0	6
CHEMBL592124	ENSG00000166851.14	PLK1	Fall	9	0
DENBUFYLLINE	ENSG00000065989.15	PDE4A	Spring	6	0
ANGUSTIBALIN	ENSG00000100219.16	XBP1	Summer	7	0
CHEMBL225519	ENSG00000164543.5	STK17A	Summer	6	2
CORTICOTROPIN	ENSG00000130164.13	LDLR	Fall	10	0
CORTICOTROPIN	ENSG00000130164.13	LDLR	Winter	1	7
TARLOXOTINIB	ENSG00000146648.17	EGFR	Summer	0	6
TPCK	ENSG00000090534.17	THPO	Fall	6	0
PIRETANIDE	ENSG00000100644.16	HIF1A	Fall	6	0
PIRETANIDE	ENSG00000100644.16	HIF1A	Spring	1	8
NV-128	ENSG00000123545.5	NDUFAF4	Fall	0	10
DOXORUBICIN	ENSG00000051382.8	PIK3CB	Fall	0	9
TORSEMIDE	ENSG00000100197.20	CYP2D6	Fall	6	0
OXALIPLATIN	ENSG00000164867.10	NOS3	Fall	8	2
OXALIPLATIN	ENSG00000164867.10	NOS3	Winter	0	9
METHYLENE BLUE	ENSG00000042088.13	TDP1	Winter	7	0
CYC-116	ENSG00000100197.20	CYP2D6	Fall	6	0
DICYCLOMINE	ENSG00000100197.20	CYP2D6	Fall	6	0
AMINACRINE HYDROCHLORIDE	ENSG00000002016.17	RAD52	Fall	6	0
[19F]-HALOPERIDOL	ENSG00000163631.16	ALB	Fall	0	8
[19F]-HALOPERIDOL	ENSG00000163631.16	ALB	Summer	10	0
R-406	ENSG00000099875.14	MKNK2	Fall	8	0
R-406	ENSG00000099875.14	MKNK2	Winter	1	7
SONIDEGIB	ENSG00000146648.17	EGFR	Summer	0	6
CHEMBL249448	ENSG00000142192.20	APP	Summer	7	0
CHEMBL261454	ENSG00000178950.16	GAK	Fall	7	0
CURCUMIN	ENSG00000146648.17	EGFR	Summer	0	6
CHEMBL146710	ENSG00000162551.13	ALPL	Fall	6	0
CROLIBULIN	ENSG00000137285.9	TUBB2B	Fall	8	0
WORTMANNIN	ENSG00000196689.11	TRPV1	Fall	10	0
NAPROXCINOD	ENSG00000073756.11	PTGS2	Summer	7	0
CHEMBL311489	ENSG00000100644.16	HIF1A	Fall	6	0
CHEMBL311489	ENSG00000100644.16	HIF1A	Spring	1	8
CHEMBL463783	ENSG00000002016.17	RAD52	Fall	6	0
DOXORUBICIN HYDROCHLORIDE	ENSG00000096384.19	HSP90AB1	Summer	6	0
LUCITANIB	ENSG00000102755.11	FLT1	Winter	1	8
CLOPIDOGREL	ENSG00000187800.13	PEAR1	Fall	6	0
SULOCHRIN	ENSG00000101751.10	POLI	Summer	0	6
AMOXICILLIN	ENSG00000179344.16	HLA-DQB1	Fall	0	8
AMOXICILLIN	ENSG00000179344.16	HLA-DQB1	Summer	6	0
PHENYLBUTYRYLHYDROXAMIC ACID	ENSG00000100429.17	HDAC10	Fall	10	0
IMATINIB	ENSG00000101966.12	XIAP	Spring	0	6
ERLOTINIB	ENSG00000105287.12	PRKD2	Fall	7	0
SB-220025	ENSG00000105287.12	PRKD2	Fall	7	0
LUMIRACOXIB	ENSG00000073756.11	PTGS2	Summer	7	0
CHEMBL388979	ENSG00000166851.14	PLK1	Fall	9	0
WORTMANNIN	ENSG00000051382.8	PIK3CB	Fall	0	9
SR9009	ENSG00000174738.12	NR1D2	Winter	9	0
CANERTINIB DIHYDROCHLORIDE	ENSG00000146648.17	EGFR	Summer	0	6
THIABENDAZOLE	ENSG00000170606.14	HSPA4	Summer	6	0
SAMALIZUMAB	ENSG00000091972.18	CD200	Fall	0	7
OCRIPLASMIN	ENSG00000115414.18	FN1	Summer	10	0
ELLIPTECINE	ENSG00000090534.17	THPO	Fall	6	0
CHEMBL547304	ENSG00000002016.17	RAD52	Fall	6	0
MAYTANSINE	ENSG00000137285.9	TUBB2B	Fall	8	0
SLAZINIC ACID	ENSG00000108773.10	KAT2A	Summer	0	6
TETRAIDOFLUORESCEIN	ENSG00000108773.10	KAT2A	Summer	0	6
ZUCLOPENTHIXOL	ENSG00000100197.20	CYP2D6	Fall	6	0
DEOXYVASICINONE	ENSG00000042088.13	TDP1	Winter	7	0
CHEMBL118378	ENSG00000166851.14	PLK1	Fall	9	0
FENTANYL	ENSG00000100197.20	CYP2D6	Fall	6	0
INSULIN	ENSG00000115386.5	REG1A	Spring	7	0
CHEMBL35482	ENSG00000242252.1	BGLAP	Fall	7	0
CHEMBL35482	ENSG00000242252.1	BGLAP	Winter	0	7
RETINAL	ENSG00000112033.13	PPARD	Fall	6	0
PF-05175157	ENSG00000076555.15	ACACB	Fall	11	1
PF-05175157	ENSG00000076555.15	ACACB	Summer	1	10
ISOORIENTIN	ENSG00000101751.10	POLI	Summer	0	6
CHEMBL56543	ENSG00000100644.16	HIF1A	Fall	6	0
CHEMBL56543	ENSG00000100644.16	HIF1A	Spring	1	8
ZAPRINAST	ENSG00000100644.16	HIF1A	Fall	6	0
ZAPRINAST	ENSG00000100644.16	HIF1A	Spring	1	8
PLICAMYCIN	ENSG00000100197.20	CYP2D6	Fall	6	0
CHLOROPHENYLPIPERAZINE	ENSG00000100197.20	CYP2D6	Fall	6	0
DOCETAXEL	ENSG00000118046.14	STK11	Fall	6	0
L-796449	ENSG00000112033.13	PPARD	Fall	6	0
2,6-DIMETHOXYQUINONE	ENSG00000166851.14	PLK1	Fall	9	0
(-)-EPICATECHIN	ENSG00000101751.10	POLI	Summer	0	6
ENLIMOMAB PEGOL	ENSG00000090339.8	ICAM1	Fall	7	0
PIMOZIDE	ENSG00000100197.20	CYP2D6	Fall	6	0
ESCULETIN	ENSG00000100644.16	HIF1A	Fall	6	0
ESCULETIN	ENSG00000100644.16	HIF1A	Spring	1	8
CURCUMIN	ENSG00000176014.12	TUBB6	Winter	3	8
MITOMYCIN	ENSG00000242252.1	BGLAP	Fall	7	0
MITOMYCIN	ENSG00000242252.1	BGLAP	Winter	0	7
MERCAPTOPURINE	ENSG00000124713.5	GNMT	Summer	0	12
GEDATOLISIB	ENSG00000160741.16	CRTC2	Fall	6	0
MELATONIN	ENSG00000131759.17	RARA	Winter	0	7
IT-139	ENSG00000044574.7	HSPA5	Summer	7	0
4-CHLOROMERCURIBENZOIC ACID	ENSG00000108773.10	KAT2A	Summer	0	6
TB-403	ENSG00000119630.13	PGF	Summer	7	0
MARIZOMIB	ENSG00000100804.18	PSMB5	Fall	0	6
CHEMBL578675	ENSG00000185513.14	L3MBTL1	Fall	6	0
CHEMBL578675	ENSG00000185513.14	L3MBTL1	Summer	0	6
PSAMMAPLIN A	ENSG00000061273.17	HDAC7	Fall	12	0
HARMALINE	ENSG00000100197.20	CYP2D6	Fall	6	0
PREDNISONE	ENSG00000100197.20	CYP2D6	Fall	6	0
CARFILZOMIB	ENSG00000129084.17	PSMA1	Fall	0	6
GLYCINE	ENSG00000100197.20	CYP2D6	Fall	6	0
CEP-1347	ENSG00000139625.12	MAP3K12	Fall	9	0
ETOPOSIDE	ENSG00000146648.17	EGFR	Summer	0	6
TETRABENAZINE	ENSG00000100197.20	CYP2D6	Fall	6	0
CAPECITABINE	ENSG00000151208.16	DLG5	Fall	7	0
CHEMBL187216	ENSG00000100197.20	CYP2D6	Fall	6	0
RESVERATROL HEXANOIC ACID	ENSG00000137462.6	TLR2	Summer	0	13
DASATINIB	ENSG00000061938.16	TNK2	Fall	6	0
VINBLASTINE	ENSG00000137285.9	TUBB2B	Fall	8	0
WORTMANNIN	ENSG00000173846.12	PLK3	Winter	0	7
PROCHLORPERAZINE	ENSG00000100197.20	CYP2D6	Fall	6	0
CHEMBL599924	ENSG00000101751.10	POLI	Summer	0	6
METFORMIN	ENSG00000118046.14	STK11	Fall	6	0
DIHYDROXIDINE	ENSG00000100197.20	CYP2D6	Fall	6	0
DITIOCARB	ENSG00000100031.18	GGT1	Summer	0	6
CHEMBL1306556	ENSG00000166851.14	PLK1	Fall	9	0
SULFASALAZINE	ENSG00000100197.20	CYP2D6	Fall	6	0
DOVITINIB	ENSG00000148053.15	NTRK2	Summer	6	1
CHEMBL408850	ENSG00000077150.18	NFKB2	Fall	11	0
CHEMBL408850	ENSG00000077150.18	NFKB2	Winter	0	6
TRITIOZINE	ENSG00000166851.14	PLK1	Fall	9	0
CHEMBL587259	ENSG00000100197.20	CYP2D6	Fall	6	0
FASUDIL	ENSG00000142875.19	PRKACB	Fall	2	7
MIVACURIUM	ENSG00000114200.9	BCHE	Summer	8	2
CEFAMANDOLE SODIUM	ENSG00000042088.13	TDP1	Winter	7	0
AMPHETAMINE	ENSG00000100197.20	CYP2D6	Fall	6	0
AMOXICILLIN	ENSG00000100197.20	CYP2D6	Fall	6	0
PHENYLSTIBONIC ACID	ENSG00000042088.13	TDP1	Winter	7	0
PALIPERIDONE	ENSG00000100197.20	CYP2D6	Fall	6	0
GRAVEOLINE	ENSG00000100197.20	CYP2D6	Fall	6	0
DEXPROPRANOLOL	ENSG00000100197.20	CYP2D6	Fall	6	0
METFORMIN	ENSG00000076555.15	ACACB	Fall	11	1
METFORMIN	ENSG00000076555.15	ACACB	Summer	1	10
SPIRAMIDE	ENSG00000100197.20	CYP2D6	Fall	6	0
PROPOFOL	ENSG00000142192.20	APP	Summer	7	0
SUMATRIPTAN	ENSG00000111664.10	GNB3	Summer	6	0
SUMATRIPTAN	ENSG00000111664.10	GNB3	Winter	0	7
CANDESARTAN CILEXETIL	ENSG00000108773.10	KAT2A	Summer	0	6
MINNELIDE	ENSG00000170606.14	HSPA4	Summer	6	0
ZUCAPSAICIN	ENSG00000196689.11	TRPV1	Fall	10	0
AMCINONIDE	ENSG00000100644.16	HIF1A	Fall	6	0
AMCINONIDE	ENSG00000100644.16	HIF1A	Spring	1	8
INDOMETHACIN	ENSG00000196689.11	TRPV1	Fall	10	0
OGLEMILAST	ENSG00000065989.15	PDE4A	Spring	6	0
FUSARIC ACID	ENSG00000100644.16	HIF1A	Fall	6	0
FUSARIC ACID	ENSG00000100644.16	HIF1A	Spring	1	8
THEOPHYLLINE	ENSG00000162889.10	MAPKAPK2	Winter	1	8
LINEZOLID	ENSG00000100197.20	CYP2D6	Fall	6	0
HT-0712	ENSG00000184588.17	PDE4B	Summer	6	0
AZD-1480	ENSG00000126561.16	STAT5A	Fall	6	0
ZAFIRLUKAST	ENSG00000100197.20	CYP2D6	Fall	6	0
LAMIVUDINE	ENSG00000243678.11	NME2	Winter	0	6
MELAGATRAN	ENSG00000126218.11	F10	Summer	6	0
CHEMBL84440	ENSG00000143727.15	ACP1	Fall	0	6
MYCOPHENOLATE MOFETIL	ENSG00000160255.17	ITGB2	Summer	0	7
ROSIGLITAZONE	ENSG00000034152.18	MAP2K3	Fall	7	3
ROSIGLITAZONE	ENSG00000034152.18	MAP2K3	Winter	1	11
CHEMBL117487	ENSG00000048052.21	HDAC9	Fall	0	6
ATORVASTATIN	ENSG00000130164.13	LDLR	Fall	10	0
ATORVASTATIN	ENSG00000130164.13	LDLR	Winter	1	7
CHEMBL1650245	ENSG00000100429.17	HDAC10	Fall	10	0
TAZAROTENE	ENSG00000131759.17	RARA	Winter	0	7
DOCETAXEL	ENSG00000198625.12	MDM4	Fall	7	0
DOCETAXEL	ENSG00000198625.12	MDM4	Spring	0	6
SNS-314	ENSG00000091436.16	MAP3K20	Spring	0	6
FENOLDOPAM BROMIDE	ENSG00000101751.10	POLI	Summer	0	6
CHEMBL599013	ENSG00000116030.16	SUMO1	Fall	0	7
OCRIPLASMIN	ENSG00000164692.17	COL1A2	Summer	12	0
MYRICETIN	ENSG00000101751.10	POLI	Summer	0	6
CLIOQUINOL	ENSG00000142192.20	APP	Summer	7	0
OLTIPRAZ	ENSG00000179218.13	CALR	Winter	0	6
CHEMBL375673	ENSG00000161800.12	RACGAP1	Spring	8	1
STAVUDINE	ENSG00000100197.20	CYP2D6	Fall	6	0
OSI-027	ENSG00000155792.9	DEPTOR	Fall	2	6
CAPSAZEPINE	ENSG00000196689.11	TRPV1	Fall	10	0
ME-344	ENSG00000109390.11	NDUFC1	Fall	0	6
PANOBINOSTAT	ENSG00000048052.21	HDAC9	Fall	0	6
CYCLOPHOSPHAMIDE	ENSG00000160255.17	ITGB2	Summer	0	7
APIGENIN	ENSG00000077150.18	NFKB2	Fall	11	0
APIGENIN	ENSG00000077150.18	NFKB2	Winter	0	6
HALOPERIDOL	ENSG00000130164.13	LDLR	Fall	10	0
HALOPERIDOL	ENSG00000130164.13	LDLR	Winter	1	7
NAPROXEN SODIUM	ENSG00000073756.11	PTGS2	Summer	7	0
SERTINDOLE	ENSG00000100197.20	CYP2D6	Fall	6	0
STAVUDINE	ENSG00000166851.14	PLK1	Fall	9	0
CHEMBL1795737	ENSG00000176014.12	TUBB6	Winter	3	8
CELECOXIB	ENSG00000175197.11	DDIT3	Winter	0	6
CHEMBL580421	ENSG00000100197.20	CYP2D6	Fall	6	0
ALCOHOL	ENSG00000078808.16	SDF4	Winter	1	8
ZILEUTON	ENSG00000100197.20	CYP2D6	Fall	6	0
KPT-9274	ENSG00000130669.17	PAK4	Fall	6	0
TENOFOVIR	ENSG00000243678.11	NME2	Winter	0	6
MIBEFRADIL	ENSG00000090534.17	THPO	Fall	6	0
TOZASERTIB	ENSG00000130669.17	PAK4	Fall	6	0
CHEMBL1161520	ENSG00000100197.20	CYP2D6	Fall	6	0
KETOROLAC TROMETHAMINE	ENSG00000073756.11	PTGS2	Summer	7	0
DIETHYLSTILBESTROL	ENSG00000100197.20	CYP2D6	Fall	6	0
CHEMBL307893	ENSG00000101751.10	POLI	Summer	0	6
FUSARIC ACID	ENSG00000185513.14	L3MBTL1	Fall	6	0
FUSARIC ACID	ENSG00000185513.14	L3MBTL1	Summer	0	6
GABAPENTIN	ENSG00000182389.19	CACNB4	Winter	6	0
CHEMBL327980	ENSG00000100197.20	CYP2D6	Fall	6	0
ARIPIPRAZOLE	ENSG00000100197.20	CYP2D6	Fall	6	0
GSK-269962A	ENSG00000164543.5	STK17A	Summer	6	2
GW843682X	ENSG00000146648.17	EGFR	Summer	0	6
PEMETREXED	ENSG00000146648.17	EGFR	Summer	0	6
CETRORELIX	ENSG00000144381.16	HSPD1	Fall	6	0
CETRORELIX	ENSG00000144381.16	HSPD1	Winter	0	6
BRIGATINIB	ENSG00000146648.17	EGFR	Summer	0	6
ELLIPTECINE	ENSG00000011304.19	PTBP1	Fall	6	1
ECONAZOLE NITRATE	ENSG00000164128.6	NPY1R	Fall	0	7
DIAZEPAM	ENSG00000163631.16	ALB	Fall	0	8
DIAZEPAM	ENSG00000163631.16	ALB	Summer	10	0
ORLISTAT	ENSG00000134780.9	DAGLA	Summer	6	0
HYPERFORIN	ENSG00000108773.10	KAT2A	Summer	0	6
LAPATINIB DITOSYLATE	ENSG00000146648.17	EGFR	Summer	0	6
ONVANSERTIB	ENSG00000166851.14	PLK1	Fall	9	0
ANTIBIOTIC	ENSG00000109971.13	HSPA8	Summer	8	0
RIVAROXABAN	ENSG00000126218.11	F10	Summer	6	0
CHEMBL1453126	ENSG00000002016.17	RAD52	Fall	6	0
NOREPINEPHRINE	ENSG00000093010.13	COMT	Fall	7	0
DOXORUBICIN	ENSG00000147133.15	TAF1	Spring	0	6
5-OXO-ETE	ENSG00000012779.10	ALOX5	Summer	0	8
KAEMPFEROL	ENSG00000101751.10	POLI	Summer	0	6
DACTINOMYCIN	ENSG00000112033.13	PPARD	Fall	6	0
TOMIVOSERTIB	ENSG00000164543.5	STK17A	Summer	6	2
NORTRIPTYLINE	ENSG00000100197.20	CYP2D6	Fall	6	0
SUFENTANIL	ENSG00000093010.13	COMT	Fall	7	0
CUSTIRSEN	ENSG00000120885.21	CLU	Fall	7	0
CUSTIRSEN	ENSG00000120885.21	CLU	Spring	0	8
LICOFELONE	ENSG00000012779.10	ALOX5	Summer	0	8
PI-103	ENSG00000198355.4	PIM3	Fall	7	0
PI-103	ENSG00000198355.4	PIM3	Winter	1	9
BROMFENAC	ENSG00000073756.11	PTGS2	Summer	7	0
TETRABROMOBENZOTRIAZOLE	ENSG00000108773.10	KAT2A	Summer	0	6
RHAMNETIN	ENSG00000188130.13	MAPK12	Fall	6	0
RHAMNETIN	ENSG00000188130.13	MAPK12	Summer	0	6
JTS-653	ENSG00000196689.11	TRPV1	Fall	10	0
ASTEMIZOLE	ENSG00000100197.20	CYP2D6	Fall	6	0
EFALIZUMAB	ENSG00000160255.17	ITGB2	Summer	0	7
GOLVATINIB	ENSG00000146648.17	EGFR	Summer	0	6
TETRACYCLINE	ENSG00000130164.13	LDLR	Fall	10	0
TETRACYCLINE	ENSG00000130164.13	LDLR	Winter	1	7
CEP-2563	ENSG00000148053.15	NTRK2	Summer	6	1
OXATOMIDE	ENSG00000100644.16	HIF1A	Fall	6	0
OXATOMIDE	ENSG00000100644.16	HIF1A	Spring	1	8
CRISABOROLE	ENSG00000065989.15	PDE4A	Spring	6	0
CHEMBL1256291	ENSG00000178623.11	GPR35	Fall	16	0
[truncated: 2,904 more rows]
